1 Molecular programming *in utero* modulates hepatic lipid metabolism and adult metabolic risk  
2 in obese mother offspring in a sex-specific manner.

3

4

5 Christina Savva<sup>1,2</sup>, Luisa A. Helguero<sup>3</sup>, Marcela González-Granillo<sup>2</sup>, Tânia Melo<sup>4,5</sup>, Daniela  
6 Couto<sup>4,5</sup>, Bo Angelin<sup>1,2</sup>, Maria Rosário Domingues<sup>4,5</sup>, Xidan Li<sup>1</sup>, Claudia Kutter<sup>6</sup> and Marion  
7 Korach-André<sup>1,2\*</sup>

8

9 <sup>1</sup>Department of Medicine, Cardiometabolic Unit and Integrated Cardio Metabolic Center  
10 (ICMC), Karolinska Institute, Stockholm, Sweden; <sup>2</sup>Clinical Department of Endocrinology,  
11 Metabolism and Diabetes, Karolinska University Hospital Huddinge, Stockholm, Sweden;  
12 <sup>3</sup>Institute of Biomedicine, Department of Medical Sciences, University of Aveiro, Portugal,  
13 <sup>4</sup>Mass spectrometry Centre, Department of Chemistry, University of Aveiro, Portugal;  
14 <sup>5</sup>CESAM, Centre for Environmental and Marine Studies, Department of Chemistry, University  
15 of Aveiro, Portugal; <sup>6</sup>Department of Microbiology, Tumor and Cell Biology, Science for Life  
16 Laboratory, Karolinska Institute, Stockholm, Sweden.

17

18 \*Corresponding author:

19 Marion Korach-André

20 Department of Medicine, Metabolism Unit

21 Karolinska Institute

22 S-141 57 Huddinge, Sweden

23 Phone: +46 8 524 82519

24 Email: marion.korach-andre@ki.se

25

26 **Abstract**

27

28 Male and female offspring of obese mothers are known to differ significantly in their metabolic  
29 adaptation and later development of complications. We investigated the sex-dependent  
30 responses in obese offspring of mice with maternal obesity, focusing on changes in liver  
31 glucose and lipid metabolism. Maternal obesity prior to and during gestation led to hepatic  
32 insulin resistance and inflammation in male offspring, while female offspring were protected.  
33 These sex differences were explained by more efficient transcriptional and posttranscriptional  
34 reprogramming of metabolic pathways to prevent the damaging effects of maternal obesity in  
35 females compared to males. These differences were sustained later in life, resulting in a better  
36 metabolic balance in female offspring. In conclusion, sex and maternal obesity drive  
37 transcriptional and posttranscriptional regulation of major metabolic processes in offspring  
38 liver differently, explaining the sexual dimorphism in obesity-associated metabolic risk.

39

40

41

42

43

## 44 **Introduction**

45 The alarming increased prevalence of overweight and obese women in reproductive age has  
46 urged the need to investigate the impact on fetal health and effects that may become evident  
47 later in life. Recent studies have demonstrated strong responses of the offspring to external  
48 factors, including nutritional, environmental and hormonal changes during the prenatal and  
49 postnatal periods<sup>1</sup>. Both in human and animal models, embryos exposed to overnutrition  
50 during gestation and lactation show metabolic alterations later in life, including increased risk  
51 of obesity<sup>2,3</sup>, impaired insulin sensitivity and glucose tolerance<sup>4</sup>, changes in microbiome  
52 composition<sup>5</sup> and increased risk of developing fatty liver disease and hepatocellular cancer<sup>6,7</sup>.  
53 Therefore, understanding how maternal obesity (MO) influences offspring health is of great  
54 importance for our ability to better anticipate public health needs, and to develop practices  
55 regarding the implementation of dietary and lifestyle interventions.

56 Important biological and physiological differences have been observed between females and  
57 males. These differences are manifested through the sex-biased incidence of many common  
58 health problems, including cardiovascular<sup>8</sup>, liver<sup>9,10</sup>, endocrine and immune diseases<sup>11</sup>.  
59 Recent studies have demonstrated that female and male sex hormones, as well as sex  
60 chromosomes, contribute to the development of obesity and insulin resistance<sup>12, 13</sup>. Moreover,  
61 the development of age-associated diseases mostly occurs in a sex-specific manner, partly  
62 correlated with changes in sex hormone levels<sup>13</sup>.

63 Our recent studies demonstrated that even when offspring received a control diet after  
64 weaning, MO altered the hepatic and adipose lipidome of the offspring in a sex-specific  
65 manner, which may contribute to the sexual dimorphism in the metabolic adaptation later in  
66 life<sup>14,15</sup>. Furthermore, sex-specific responses to high calorie-diets have also been described<sup>16</sup>,  
67 implying that sex hormones might play a major role, although the underlying mechanisms are  
68 not well understood. Using *ob/ob* mice, we could previously show that there are sex-specific  
69 pathways of lipid synthesis in the liver which determine the molecular lipid composition, and  
70 hereby may play a key role in the sexual dimorphism of obesity-associated metabolic risk<sup>17</sup>.  
71 We also found that estrogen could rescue some of these affected pathways in males by

72 controlling key genes of the lipid synthesis pathways through interaction with the nuclear  
73 estrogen receptors alfa and beta<sup>17</sup>.  
74 However, the mechanisms by which MO might differently program transcriptional and  
75 posttranscriptional activities in female and male offspring have not been assessed. Therefore,  
76 we have now explored how MO affects adiposity, metabolic adaptation and hepatic lipid  
77 composition in obese female and male offspring. First, we examined the sex-specific  
78 metabolic adaptation to high fat diet in offspring, and second, whether MO affected the hepatic  
79 lipidome and transcriptome differently in female and male offspring from weaning to 6-months  
80 of age. We further evaluated if the maternal and offspring high-fat diet may determine adiposity  
81 and liver steatosis in the same individual at different time-point in life (3-months and 6-months)  
82 using magnetic resonance imaging and localized spectroscopy. We discovered that the  
83 metabolic response to MO is sex-dependent due to sex-specific transcriptional and  
84 posttranscriptional activity in the liver. MO reduced the fraction of monounsaturated and  
85 increased that of polyunsaturated lipids in male offspring, while the fraction of saturated lipids  
86 was increased at an early age in females. Finally, we also identified sex-specific hepatic lipid  
87 molecular species and transcriptional regulations associated with offspring metabolic  
88 dysfunctions in obesity.

89

## 90 **Results**

91 **Maternal obesity redistributes the adipose tissue and insulin sensitivity differently in**  
92 **female and male offspring.** Consumption of the high-fat (HF) diet by F0 dam for 6 weeks  
93 prior to mating led to a significant increase of body weight compared to the control (C) diet fed  
94 F0 dam (body weight after 6 weeks of diet:  $34.6 \pm 1.8$  g *versus*  $22.2 \pm 0.2$  g,  $p < 0.001$ ). F0 sires  
95 were fed the C diet throughout the study. F0 dam remained on their respective diet during  
96 pregnancy and lactation. All F1 female and male offspring received the HF diet after weaning  
97 (Fig.1a). The body weight of female offspring born from obese mothers (F-HF/HF) and those  
98 born from lean mothers (F-C/HF) was similar. In contrast, males born from obese mothers (M-  
99 HF/HF) showed significantly lower body weight than those born from lean mothers (M-C/HF)

100 from birth until week 9 of age and thereafter gained more weight than M-C/HF, even though it  
101 did not reach significance after week 17. Males weighed significantly more than females after  
102 week 10, regardless of the maternal diet (Fig.1b; S,  $p < 0.001$ ). To determine if maternal obesity  
103 (MO) altered the adiposity in offspring in the short or/and long term, we defined the body fat  
104 distribution by magnetic resonance imaging (MRI) at 12-week (midterm, MID) and 25-week  
105 (endterm, END) of age in the same individual. M-C/HF had more body fat than F-C/HF at MID,  
106 which became similar in both sexes at END. M-HF/HF but not F-HF/HF accumulated less fat  
107 compared to offspring born from C diet mothers at MID but became similar at END (Fig.1c).  
108 Distribution of visceral (VAT) and subcutaneous (SAT) adipose tissue was diet- and sex-  
109 dependent. At MID, M-C/HF had more VAT than F-C/HF, but MO reduced VAT in males to  
110 the level of females (Fig.1d).  
111 SAT is considered as the “protective” fat as it buffers extra calories intake and reduces ectopic  
112 fat accumulation<sup>18</sup>. We therefore investigated closer the SAT distribution in offspring. At MID,  
113 total SAT was diet- and sex-dependent but normalized at END (Fig.1e). At MID, the SAT  
114 located in the abdominal region (Abd SAT) was highly maternal diet-dependent and reduced  
115 in both sexes by MO. At END, it was higher in males than in females regardless of maternal  
116 diet (Fig.1f). The ratio between the total SAT and the Abd SAT revealed that MO redistributed  
117 SAT outside of the abdominal region in females but not in males (Fig.1g).  
118 RNA sequencing of SAT and VAT was performed to explore if MO affected its transcriptional  
119 activity, with a special focus on browning process, inflammation and oxidative phosphorylation  
120 pathways, which play a major role in adipose tissue homeostasis<sup>15</sup>. Interestingly, females  
121 showed very few deregulated genes in response to MO in SAT but a highly enriched oxidative  
122 phosphorylation pathway activity, and induced *Ucp1* gene expression (marker of browning) in  
123 VAT (Suppl.Fig.S1a). Conversely, males induced significantly the expression level of a large  
124 number of genes of the inflammatory pathways, and reduced the expression level of several  
125 genes of the oxidative phosphorylation pathways in SAT (Suppl.Fig.S1a).  
126 Changes in body fat distribution are closely correlated to metabolic disturbances. We  
127 evaluated, at the two timepoints, the glucose tolerance and insulin sensitivity in offspring by

128 oral glucose tolerance (OGTT) and insulin tolerance (ITT) tests. At MID, glucose tolerance  
129 was highly diet- and sex-dependent, and males but not females showed impaired glucose  
130 tolerance by MO (Fig.1h). Males showed reduced insulin sensitivity (high systemic insulin  
131 levels) compared to females in both diet conditions (Fig.1i). MO impaired insulin sensitivity  
132 after insulin injection in males only (Fig.1j). At END, males showed impaired glucose tolerance  
133 together with impaired insulin sensitivity compared to females, regardless of the maternal diet  
134 (Figs.1k-m).

135 In sum, males but not females showed impaired insulin sensitivity with MO, possibly due to  
136 remodeling of subcutaneous fat distribution in the abdominal region associated with low-grade  
137 inflammation.

138

139 **Maternal obesity alters endocrine parameters and modulates hepatic insulin**  
140 **transcriptional activity in offspring.**

141 Obesity and HF diet are factors that provoke changes in circulating lipids and cytokines. While  
142 MO female offspring had unchanged total triglyceride (TG), their male counterparts displayed  
143 elevated levels (Table 1). Total cholesterol (Total Chol) levels were increased in MO offspring  
144 of both sexes, due to increased HDL-Chol (Table 1). Circulating cytokine profile was highly  
145 sex- and maternal diet-dependent. No sex differences were observed in C/HF group except  
146 for PAI-1, a strong predictor of type-2 diabetes and metabolic syndrome<sup>19</sup>, that was higher in  
147 males than in females in both diet groups. MO increased circulating levels of ghrelin, GIP and  
148 resistin in females to a higher level than males, all markers of improved insulin sensitivity and  
149 glucose homeostasis<sup>20,21</sup>. These results would indicate that MO affects positively the  
150 circulating profile in females as opposed to males that seem to stay impaired.

151

152 To explore if the observed sex-dependent metabolic adaptation to MO was associated to  
153 changes at the transcriptional level, we performed RNA sequencing in the livers of the  
154 offspring. This analysis clearly indicated that gene expression activity was sex- and maternal  
155 diet-dependent (Suppl.FigS1b). The Kyoto Encyclopedia of Genes and Genomes (KEGG)

156 pathway analysis revealed that 32% (93/290) and 17% (48/290) of the pathways were  
157 significantly different between sexes in C/HF and HF/HF, respectively (Suppl.FigS1c; red and  
158 blue boxes). Most importantly, in about one third of the pathways (green and purple boxes)  
159 female and male offspring responded in opposite ways to MO which altered significantly 23%  
160 (68/290) of the pathways in females and 15% (45/290) in males (Suppl.FigS1c).

161 Since we observed impairment of insulin sensitivity in M-HF/HF, we inspected genes involved  
162 in insulin signaling pathways. There were no significant differences between the sexes (Fig.1n;  
163 left panel). However, it is interesting to note that several pathways were regulated differently  
164 between sexes between the C/HF and HF/HF groups. For example, AMPK signaling, insulin  
165 resistance and secretion, insulin signaling, and type II diabetes mellitus pathways tended to  
166 be higher expressed in females than males in C/HF but lower in HF/HF group. This suggests  
167 that MO primes insulin signaling pathways inversely in male and female offspring. Indeed,  
168 when comparing the maternal diet effect, AMPK insulin signaling, and type 2 diabetes  
169 pathways were induced upon MO in males but reduced in females (Fig.1n; right panel). In  
170 addition, MO significantly reduced cAMP signaling pathway in females and insulin secretion  
171 in males only.

172 In line with these results, we extracted all the differentially expressed genes (DEG) from the  
173 selected insulin pathways (Suppl.TableS1) and found four DEG known as key regulators of  
174 hepatic insulin sensitivity (*Pdk1*, *Lpin1*, *Nox4* and *Prlr*) that were significantly altered by sex  
175 and by MO (Fig.1o). *Pdk1*, *Lpin1* and *Prlr* expressions were significantly higher in F-C/HF  
176 compared to M-C/HF while *Lpin1* was lower and *Prlr* higher in F-HF/HF compared to M-HF/HF.  
177 MO downregulated *Pdk1* and *Lpin1* expression in females but upregulated *Lpin1* in males.  
178 *Nox4* expression was higher in males than females in both diet groups (Fig.1o). Moreover, a  
179 large set of genes was differently regulated between sexes in C/HF and much less in HF/HF  
180 due to a remodeling of gene activity from the insulin pathways with MO in females only  
181 (Suppl.TableS1).

182 In conclusion, males showed impaired insulin sensitivity compared to females when fed a HF  
183 diet. MO impaired insulin response associated with a reduction of the signaling pathways  
184 activity at both transcriptional and post-transcriptional levels.

185

186 **Maternal obesity remodels hepatic triglyceride profile in female offspring.** Obesity and  
187 insulin resistance are associated with hepatic lipid disorders, including liver steatosis, which  
188 can further develop into hepatocellular carcinoma<sup>22</sup>. Proton magnetic resonance spectroscopy  
189 is a prime method to track TG composition in real time (Fig.2a). Therefore, we investigated *in*  
190 *vivo* the TG profile in offspring livers at the two time-points (MID and END). The fraction of  
191 lipid mass (fLM) was unchanged by MO both at MID and END, with males having higher fLM  
192 than females (Fig.2b). MO induced the fraction of saturated lipids (fSL) in females at MID but  
193 not at END. At END, F-C/HF tended to have higher fSL than M-C/HF (Fig.2c). At MID, the  
194 fraction of monounsaturated lipids (fMUL) was similar in all groups, whereas MO severely  
195 reduced the fMUL in males at END (Fig.2d). At MID, MO reduced the fraction of  
196 polyunsaturated lipids (fPUL) in females, while it was unchanged in males. At END, M-HF/HF  
197 had significantly higher fPUL than F-HF/HF (Fig.2e).

198 Changes in hepatic TG profile have been associated with several metabolic diseases including  
199 insulin resistance, metabolic-associated fatty-liver diseases (MAFLD) and hepatocellular  
200 carcinoma<sup>23,24</sup>. Therefore, we analyzed the TG composition in harvested livers using lipidomic.  
201 We found 10 TG groups that were classified as low abundant (TG low), moderate abundant  
202 (TG moderate) and high abundant (TG high). Overall, TG groups were sex-dependent with M-  
203 C/HF having more TG46, TG56, TG58 and TG60 than F-C/HF; but less of TG54 (Figs.2f-h).  
204 Interestingly, MO tended to reduce the proportion of short chain TG (TG46, TG48, TG50 and  
205 TG51) and to increase long chain TG (TG56, TG58 and TG60) in females only (Figs.2f-h). TG  
206 species comprised in each TG group were also highly sex-dependent, but MO remodeled TG  
207 species mostly in females (Fig.2i and Suppl.Figs.S2a-c). Modification of the saturation profile  
208 of hepatic TG has been correlated to several metabolic dysfunctions. Males showed lower  
209 abundance of TG-containing 3- and 4-double bonds and tended to have more TG-containing



210 5+-double bonds than females regardless of the maternal diet (Fig.2j). MO reduced the  
211 proportion of TG-containing 2-double bonds in females.

212 Fatty acids (FA) as part of TG molecules act as signaling molecules that can modulate  
213 metabolic response in obesity. FA composition was sex-dependent whereby males had higher  
214 abundance of the C20:0, C20:1 $\omega$ 9, C20:2 $\omega$ 9 and C20:3 $\omega$ 6 species compared to females,  
215 irrespective of the maternal diet. MO increased the abundance of C18:2 $\omega$ 6 and reduced C16:0  
216 species in females (Suppl.Fig.S3a). MO increased the proportion of  $\omega$ 6 FA in females  
217 (Suppl.Fig.S3b). M-C/HF had globally more of the PUFA than F-C/HF; MO increased FA-  
218 containing 2- and 3-double bonds in females (Suppl.Fig.S3c). Desaturation of FA is controlled  
219 by desaturase enzymes. The desaturase activity  $\Delta$ 9 was unchanged between groups but  $\Delta$ 5  
220 was significantly higher in females than in males in both diet conditions (Suppl.Fig.S3d).

221 In sum, hepatic FA and TG composition is sex dependent, and MO remodeled FA and TG  
222 profiles differently in female and male offspring, which may promote sex-dependent liver  
223 dysfunctions later in life.

224

225 KEGG pathway analysis revealed that PPAR signaling and FA degradation pathways,  
226 indicative for FA breakdown, as well as NAFLD pathway were higher expressed in males than  
227 in females in both diet conditions (Fig.2k, left panel). In contrast, the FA biosynthesis pathway  
228 activity was higher in F-C/HF than in the M-C/HF but not in the HF/HF group due to a significant  
229 reduction of activity by MO in females. MO reduced fat digestion and absorption and lipolysis  
230 in adipocytes pathways activity in females while increased the NAFLD pathway in both sexes  
231 (Fig.2k, right panel). We next inspected genes involved in the selected lipid pathways and  
232 found a large number of DEG between sexes in C-HF and much less in HF/HF. These  
233 changes were explained by remodeling of gene activity by MO in females only  
234 (Suppl.TableS2). We then extracted key DEG involved in hepatic lipid homeostasis, namely  
235 the long-chain acyl-CoA synthase family members (*Acs1/3/4/5*), the *Pklr*, *Acox1*, *Pcsk9* and  
236 *Pnpla3* genes. Their expression levels were highly sex-specific and were reduced by MO in

237 females (Figs.2l-m). Modulation of these genes affects hepatic intracellular TG levels and the  
238 viability of these cells<sup>25,26</sup>.

239 In conclusion, hepatic transcriptional regulation of lipid pathways is sex- and maternal diet-  
240 dependent and may be a key contributor to the sexual dimorphism in obesity-associated liver  
241 disorders.

242

243 **Maternal obesity remodels hepatic phospholipid profile in offspring.** In hepatic cells,  
244 phospholipids (PL) comprise the most abundant lipid class. PL are found in the plasma  
245 membrane and intracellular organelles, and the lipidome of each organelle may be remodeled  
246 by extra- and intra-cellular stimulations that may also affect lipid trafficking across the  
247 membrane and the organelles. We comprehensively profiled hepatic PL using a LC-MS  
248 lipidomic approach. Principal component analysis separated the PL classes into two distinct  
249 groups clustered by sexes (Fig.3a), which indicates that PL profile is strongly sex dependent.  
250 Four major subclasses of PL were found, phosphatidylcholine (PC), lysoPC (LPC),  
251 phosphatidylethanolamine (PE) and lysoPE (LPE) (Fig.3b and Suppl.Figs.S4a-b). The relative  
252 abundance of the total PC, PE and LPC classes was similar between sexes in both maternal  
253 diet conditions, but males had more LPE than females regardless of the maternal diet (Fig.3c  
254 and Suppl.Figs.S4a-b). However, F-C/HF had higher relative level of PC30, PC40 and PC42  
255 classes and lower level of PC36 class than M-C/HF. MO increased the relative level of PC34  
256 class to a higher level in males than in females, and increased the PC40 class in females to  
257 a higher level than males (Fig.3c). No differences were observed between sexes in PE classes  
258 regardless of maternal diet, but males overall tended to have higher levels of PE than females  
259 (Fig.3d). In the PC and PE classes, 15/30 PC and 8/25 PE species had different abundancies  
260 between sexes in C/HF group. MO reduced these differences considerably, to 5/30 for PC  
261 and 2/25 for PE. This occurred mainly through remodeling PC and PE species in females  
262 (Suppl.Figs.S4c-d). PC and PE saturation profiles were sex-dependent in C/HF offspring, and  
263 MO abolished the sex differences (Fig.3e). Interestingly, males tended to have higher relative  
264 levels of the LPC species, and had higher levels than females of most of the LPE species

265 regardless of the maternal diet (Figs.3f-g and Suppl.Figs.S4e-f). The saturation profile was  
266 highly variable between sexes in C/HF but not in HF/HF group (Figs.3h-i), consonant with  
267 remodeling in female offspring by MO.

268 Other low abundant subclasses of PL were detected by LC-MS, namely phosphatidylserine  
269 (PS), phosphatidylglycerol (PG), cardiolipin (CL) and phosphatidylinositol (PI) and two  
270 sphingolipids, ceramides (Cer) and sphingomyelin (SM) (Fig.3b). The PS class, and the  
271 relative levels of 5/7 and 3/7 PS species were significantly reduced by MO in males and  
272 females, respectively (Fig.3j and Suppl.Figs.S5a-b). The PS saturation profile was affected by  
273 MO and was sex-dependent in HF/HF (Fig.3k). PG classes and species were higher in  
274 females than males in C/HF, but MO tended to reduce most of the PG species in females to  
275 the level seen in males. The PG saturation profile was sex-dependent, with no effect of  
276 maternal diet (Figs.3l-m and Suppl.Figs.5c). CL class and species were more abundant in  
277 females than males, especially in C/HF group. MO tended to reduce CL level in females with  
278 no differences in the saturation profile between all groups (Figs.3n-o and Suppl.Fig.S5d). PI  
279 classes and species were more abundant in males than in females regardless of the maternal  
280 diet, with males having more of the PI-containing 3- and 2-double bonds than females in C/HF  
281 and in HF/HF respectively. F-C/HF showed more of the PI-containing +4-double bonds than  
282 M-C/HF (Figs.3p-q and Suppl.Fig.S5e).

283 The Cer class was induced by MO in both sexes, with females having more of the Cer(d34)  
284 and Cer(d36) and less Cer(d40) classes than males in both maternal diet groups (Fig.3r and  
285 Suppl.Fig.S5f). Of note, the glucosylceramide (GlcCer) species were reduced and induced by  
286 MO in females and males respectively, leading to higher abundance in males. F-C/HF had  
287 more of the ceramides containing 1-double bond and less of those containing 2-double bonds  
288 than M-C/HF; no differences were observed between sexes in the MO group (Fig.3s). Females  
289 and males had similar relative SM abundance but contained different SM species in both  
290 maternal diet groups (Fig.3t and Suppl.Fig.S5g). DEG analysis of RNA-seq data established  
291 that sex is a major regulator of the PL pathways at the transcriptional level and demonstrated  
292 that MO remodeled gene expression in females only (Fig.3u).

293 In conclusion, PL classes and species are mainly dependent on sex, while the maternal diet  
294 in particular influences the LPE, PS and Cer classes. Overall, females have more PG and CL,  
295 and less lysoPL and sphingolipids, than males. These sex-specific classes of PL could be  
296 attributed to sex-dependent transcriptional activity of major genes involved in the PL synthesis  
297 pathways. The sexual dimorphism in the PL profile could contribute to the sex-dependent  
298 metabolic adaptation to MO by modulating transmission of biological signals across the cell  
299 and lipid droplet membranes.

300

301 **Transcriptional and posttranscriptional regulation of metabolic pathways in offspring**  
302 **liver is sex- and maternal diet-dependent.** Hematoxylin-eosin-stained liver sections from  
303 female and male offspring showed that males had higher number and larger size lipid droplets  
304 compared to females (Fig.4a). TG and PL are central in the control of fatty liver diseases<sup>23,27</sup>.  
305 In addition, dysfunctional TG and PL (such as saturated PL) may initiate ER stress and  
306 inflammation<sup>28</sup>. To investigate the transcriptional hepatic metabolic regulation in offspring that  
307 might account for sexual dimorphism in obesity, we first performed a genome-wide differential  
308 gene expression analysis in response to MO in females and in males (Figs.4b-d), and between  
309 sexes in C/HF and HF/HF (Figs.4e-g). This revealed that females showed more DEG than  
310 males (325 vs 33) in response to MO and only four DEG were shared between sexes  
311 (*Cyp2c37*, *Cyp2c50*, *Cyp2c54* and *Sult2a8*). These four genes are key regulator of hepatic  
312 lipid and energy metabolism, and were all up-regulated by MO in both sexes (Suppl.Fig.S6a).  
313 Compared to females, males showed higher expression levels of *Sult2a8* and *Cyp2c54* and a  
314 lower expression level of *Cyp2c37* in both diet. About half of the DEG were up- and half were  
315 downregulated by MO in both sexes (Figs.4c-d). When we compared sex differences for each  
316 maternal diet conditions, we observed about half of the DEG between sexes (46%) exclusively  
317 in C/HF group and about one third (32%) exclusively in HF/HF group. Only 22% of the DEG  
318 were shared between C/HF and HF/HF (Fig.4e). Among the DEG about half were down- and  
319 half were upregulated between sexes (Figs.4f-g).

320 We performed GO enrichment analysis for up- and downregulated genes and extracted the  
321 top 10 enriched GO terms for up- and downregulated genes. In females, MO upregulated  
322 metabolic and catabolic processes and downregulated immune and inflammatory processes  
323 (Fig.4h). In males, MO upregulated xenobiotic and fatty acid metabolic processes and down-  
324 regulated biosynthetic processes (Fig.4i). When comparing sexes in the C/HF group, we found  
325 increased catabolic processes and lipid metabolism pathway activity and decreased lipid and  
326 steroid biosynthetic activity in males compared to females (Fig.4j). In HF/HF, males showed  
327 increased metabolic and catabolic processes and a decrease in immune and inflammatory  
328 pathways activity compared to females (Fig.4k). Altogether these results indicate that MO  
329 alters the liver transcriptome much more in females than in males. We confirmed that MO  
330 reprograms the transcription of genes in offspring liver in a sex-dependent manner.  
331 Given the sex-difference observed for the content of hepatic lipid droplets, we explored  
332 pathways involved in inflammation to compare the effects of sex and maternal diet (Fig.4l).  
333 This analysis unveiled that the activity of inflammatory pathways was higher in F-C/HF than in  
334 M-C/HF. These differences were abolished by MO, whereas it induced inflammatory pathway  
335 activity mainly in males. In contrast, females significantly induced gene expression program  
336 related to apoptosis pathways, and we observed a trend encompassing reduced gene  
337 expression of B cell receptor, leukocyte migration, natural killer and T cell receptor signaling  
338 pathways. These results indicate that there is a sex-dependent regulation of inflammatory  
339 pathways in livers of offspring, and that MO modulates pathways differently between sexes.  
340 We then extracted the DEG in all the selected inflammatory pathways and could show that  
341 MO altered the expression of a very few genes in female livers only (Suppl.TableS3). Among  
342 those, we found genes belonging to the cathepsin (*Cts*) family that drive liver inflammation  
343 and fibrosis (Fig.4m). Interestingly, the expression of all *Cts* genes was higher in F-C/HF than  
344 in M-C/HF. MO reduced the expression level of *Cts* genes in females to similar levels than  
345 males. In sum, MO appears to prevent liver injury in female obese offspring by reducing  
346 inflammatory processes.  
347

348 **MO prevents hepatocellular carcinoma development in obese female offspring.** Recent  
349 research in animal models has elucidated potential programming mechanisms that include  
350 altered hepatic function<sup>29-32</sup> and cellular signaling responses<sup>33,34</sup>. Histological analysis of the  
351 liver structure in offspring revealed the presence of marked areas of cell proliferation in female  
352 livers. This was in marked contrast to males, where liver biopsies displayed small and  
353 scattered proliferative spots. Importantly, MO reduced the cell proliferation areas in females  
354 (Fig.5a). By exploring KEGG pathways associated with cancer, we could show that their  
355 activity was higher in females than in males, regardless of maternal diet. MO repressed the  
356 cell cycle and induced chemical carcinogenesis, notch signaling and retinol metabolism  
357 pathways in females. In contrast, MO reduced notch signaling pathway activity in males and  
358 induced retinol metabolism (Fig.5b). We extracted all the DEG of the selected cancer  
359 pathways (Suppl.TableS4) and isolated two major superfamily genes, namely the UDP-  
360 glycosyltransferases (*Ugt*) and the sulfotransferases (*Sult*), which both showed highly sex-  
361 specific expression. Indeed, *Ugt3* and *Ugt2* genes were more highly expressed in males than  
362 in females, whereas the expression of *Ugt1* and all *Sult* genes - except for *Sult2a8* - were  
363 higher in females (Figs.5c-d). MO induced the expression level of the *Ugt* genes in both sexes  
364 (Fig.5c). Remarkably, among the two key genes known as tumor repressors (*Osgin1* and  
365 *Stat1*) *Osgin1* was more expressed in M-C/HF than F-C/HF, but both were overexpressed by  
366 MO in females (Fig.5e). In line with this, genes promoting cancer development and cell  
367 apoptosis (*Ccnd1*, *Fdps* and *Pik3r1*) had lower expression in M-C/HF than in F-C/HF, and MO  
368 reduced the expression in females only (Fig.5f).  
369 Overall, MO tended to reduce cell proliferation markers, and to induce the expression level of  
370 tumor repressor and cell apoptosis genes in females, which would indicate a protective  
371 mechanism of MO on obese female offspring.

372

373 Collectively our data demonstrate that MO modulates differently the metabolism in female and  
374 male offspring. We show that sex and MO drive transcriptional and posttranscriptional  
375 regulation of major metabolic processes in offspring liver which contribute to the sexual

376 dimorphism in obesity-associated metabolic risks. In figure 6 we summarized the possible  
377 mechanisms by which MO may protect female offspring from metabolic impairment, as  
378 opposed to male offspring that are impaired. We define differently programmed effects in the  
379 female and male liver offspring exposed to MO. Livers from female offspring demonstrate  
380 decreased lipogenesis and pro-inflammatory genes, decreased HCC, and remodeling of TG  
381 species. These effects were supported by an increased oxidative phosphorylation and  
382 browning pathways activity in adipose tissue (Fig.6a). Livers from male offspring show hepatic  
383 steatosis, impaired insulin sensitivity and increased inflammation, possibly due to feedback  
384 mechanisms from the subcutaneous adipose tissue (Fig.6b).

## 385 DISCUSSION

386 The current study reveals a number of important mechanisms through which maternal diet  
387 primes lipid metabolism differently in obese female and male offspring liver. We previously  
388 demonstrated that MO leads to a sexually dimorphic reprogramming of hepatic lipid  
389 composition and gene expression, and that this also occurs when the offspring receive a  
390 postweaning control diet. We also showed that other organs are affected in a sex-dependent  
391 manner<sup>15</sup>. We now show that MO offspring fed an obesogenic diet have sex-specifically  
392 altered liver lipidomes explained by accompanying changes in the transcriptomes. When  
393 compared to males born to lean mothers, males with obese mothers showed insulin resistance  
394 and glucose intolerance at early life stage of life. Moreover, MO did not protect male offspring  
395 from the adverse effect of a continued obesogenic diet intake. M-HF/HF had lower body  
396 weights early after weaning (3-9 weeks old), while their growth accelerated spontaneously at  
397 a later stage (10-15 weeks old). This was associated with metabolic complications including  
398 insulin resistance later in life<sup>35</sup>. While M-HF/HF had normal glucose tolerance at MID, they  
399 showed impaired glucose tolerance and insulin sensitivity, together with impaired insulin  
400 secretion activity and higher circulating level of PAI-1, at END. These findings were opposite  
401 to those in female offspring which were not compromised by MO. MO prior to mating and  
402 during gestation and lactation did not affect the body weight of obese female offspring, but  
403 provoked redistribution of the SAT toward more peripheral and less abdominal accumulation.  
404 Interestingly, three major regulators of insulin sensitivity, 3-phosphoinositide-dependent  
405 protein kinase-1 (*Pdk1*), NAD(P)H oxidase 4 (*Nox4*) and prolactin receptor (*Prlr*)<sup>36-38</sup>, were  
406 significantly influenced by sex. Males showed reduced *Pdk1* and *Prlr* together with elevated  
407 *Nox4* expression levels. These genes involved in the development of insulin resistance are  
408 controlled by estrogen<sup>39,40</sup>. It is of interest to note, that we previously could demonstrate that  
409 feeding a control diet after weaning of male offspring to obese mothers improved insulin  
410 sensitivity at END<sup>14</sup>. This indicates that the changes induced by MO *in utero* in male offspring  
411 can be reversed by a post-weaning diet.



412 By using cross-sectional data analysis obtained by multidisciplinary techniques, we showed  
413 that lipid profile in the liver of the offspring was sex-dependent, and that it is changed by  
414 modulating transcriptional activities, in a sex-dependent manner. We uncovered that relative  
415 abundancies of PL, TG and FA lipid species were different between sexes, which may be a  
416 key element in the sex-specific metabolic complications in obesity. Most importantly, we  
417 confirm our previous findings that MO modulates hepatic TG molecular species in female but  
418 not in male offspring<sup>14</sup>. Somewhat surprising, we demonstrated that MO regulates the gene  
419 expression in white adipose in male offspring towards an inflammatory pattern, while instead  
420 altering it towards more browning and oxidative phosphorylation patterns in females<sup>15</sup>. The  
421 mechanisms by which MO can differently modulate epigenetic marks *in utero* between sexes  
422 and between tissues remain intriguing and require further investigation.

423

424 Desaturases are enzymes that control the balance between saturated, monounsaturated and  
425 polyunsaturated FA being incorporated into TG and PL. When fed a control diet after weaning,  
426 offspring born from obese mothers showed sex-dependent  $\Delta 9$  desaturase activity but similar  
427  $\Delta 5$  desaturase activity<sup>14</sup>. In the current study, male offspring showed lower  $\Delta 5$  desaturase  
428 activity compared to females in both mother diet groups. A low  $\Delta 5$  is correlated to insulin  
429 resistance, abdominal adiposity and predicts the development of type-2 diabetes<sup>41-43</sup>. Long  
430 chain acyl co-A synthetases (*Acs/*) are important regulators of FA uptake. *Acs/1* promotes TG  
431 accumulation in the liver as opposed to *Acs/3* (localized in lipid droplets) and *Acs/5* (in  
432 mitochondria), which regulate lipogenesis and  $\beta$ -oxidation, respectively, thereby being  
433 essential for lipid homeostasis<sup>25,44</sup>. Importantly, the *Acs/* isoform expression patterns seen in  
434 our study were highly sex- and maternal-diet dependent, and may contribute to the sexual  
435 dimorphism in obesity and in responses to MO. Interestingly, *Acs/* expression has been shown  
436 to be controlled by estrogen in mammals<sup>45</sup> and other species<sup>46</sup>.

437

438 Alterations of hepatic lipid composition are likely to cause liver damage through various  
439 processes, including inflammation, oxidative stress, fibrosis and hepatocellular carcinoma.  
440 The expression of cathepsin (Cts) genes was higher in females than in males born to lean  
441 mothers, with MO strongly reducing Cts expression in females (to “male” levels). Cts has  
442 several functions, including the facilitation of cholesterol excretion and protection against  
443 inflammation and CtsD has been identified as a marker of liver inflammation and fibrosis in  
444 murine steatohepatitis<sup>47</sup>. In line with this, female offspring of MO showed smaller lipid droplets  
445 and reduced cell proliferation and inflammation as compared to those born from lean mothers,  
446 which could be an estrogen-dependent effect<sup>48,49</sup>. We found sex-specific and maternal diet-  
447 dependent changes in the expression of members of the UDP-glucuronosyltransferase (UGT)  
448 and sulfotransferase (SULT) gene families. These are essential for the metabolism of  
449 xenobiotic and endobiotic substances and may be crucial regulators of hepatic cholesterol  
450 and lipid homeostasis<sup>50-53</sup>. The mechanism(s) by which MO and estrogen protect female  
451 offspring from liver dysfunction need to be addressed in more extensive future studies.

452

453 In conclusion, our detailed studies in mice clearly demonstrate that MO is a preponderant  
454 factor for metabolic alterations in offspring. Notably, we show that MO affects hepatic lipid  
455 metabolism differently in obese female and male offspring through sex-specific alterations of  
456 the expression of genes involved in insulin signaling, liver steatosis, inflammation, fibrosis and  
457 carcinoma. A summary of our main findings in female and male offspring is presented in Fig  
458 6. MO can obviously modulate gene expression between sexes as well as between tissues.  
459 Interestingly, while MO clearly has negative metabolic effects in male offspring, it seems to  
460 protect from the development of insulin resistance and even liver fibrosis and carcinoma in  
461 female offspring. The identification of several sex- and maternal diet-regulated genes involved  
462 in these processes should now permit further exploration of their possible use to target  
463 cardiometabolic risk in humans.

464

465

## 466 **Methods**

467 **Mice and diet.** All animal procedures were approved by the local Ethical Committee of the  
468 Swedish National Board of Animal Experiments. Virgin C57Bl6/J female dams and male sires  
469 were received at 4 weeks of age. F0 dams were housed in pairs in six different cages and fed  
470 either the control diet (C; D12450H, Research Diets, NJ, USA; 10% kcal fat from soybean oil  
471 and lard; n=6, F0-CD) or the high fat diet (HF; D12451, Research Diets, NJ, USA; 45% kcal  
472 fat from soybean oil and lard; n=6, F0-HFD) for six weeks before mating. Sires remained on  
473 control diet (C) until sacrifice. After six weeks of their respective diet two F0 dams were mated  
474 with one F0 sire. During this short mating period (up to five days) sires were on the same HF  
475 as dams in the group (experimental unit). The sires spermatozoa were unlikely affected by the  
476 HFD given a general sperm maturation time of approximately 35 days<sup>54</sup>. After mating, F0  
477 males and pregnant dams were separated. F0 dams were continuously exposed to their  
478 respective diets throughout pregnancy and until the end of the lactation period. The F1  
479 offspring were weaned at 3-week of age. Afterwards, F1 males and females were sex-  
480 separated, three to five animals were housed per cage and fed with HFD until the end of the  
481 study (Fig.1a). To simplify the naming convention, the group of offspring born from HFD fed  
482 dams were named HF/HF (for HFD F0 dam and HFD F1 offspring) and the group of offspring  
483 born from CD fed mother named C/HF (for CD mother and HFD offspring). All mice were  
484 housed in a 23°C temperature-controlled 12h light/dark room, with free access to water and  
485 food unless specified. Body weight was recorded weekly throughout the study in all groups.  
486 Average food intake in offspring was recorded twice a week for three weeks in four different  
487 cages containing grouped mice (n=3-5 animals per cage) around 4-month of age and at least  
488 one week after recovering of *in vivo* experiments. We then calculated the average food intake  
489 per cage during the three experimental weeks. We reported it to the average food intake per  
490 mouse according to the number of animals in the cage.

491

492 ***In vivo* magnetic resonance imaging (MRI).** Animals were anesthetized using isoflurane  
493 (4% for sleep induction and ~2% for sleep maintenance) in a 3:7 mixture of oxygen and air,

494 before being positioned prone in the MR-compatible animal holder. Respiration was monitored  
495 during scanning (SA-instruments, Stony Brook, NY, USA). Core body temperature was  
496 maintained at 37°C during scanning using a warm air system (SA-instruments, Stony Brook,  
497 NY, USA). Magnetic resonance imaging (MRI) images (n=5-7 per group) were collected using  
498 a 9.4 T horizontal bore magnet (Varian Yarnton UK) equipped with a 40 mm millipede coil, as  
499 previously detailed<sup>5</sup>. Fiji software (<http://fiji.sc>) was used to compute the volume of fat in  
500 different regions of interest in the body. Visceral fat (VAT) was calculated as the difference  
501 between the total (TF) signal and the total subcutaneous fat (Total SAT) signal in the  
502 abdominal region. Abdominal fat (ABD) comprises the SAT and the VAT fat signals from the  
503 abdominal region and the SAT in ABD was calculated as the difference between the ABD fat  
504 and the VAT. MRI experiments were performed on the same mouse (F1) at the age of 3  
505 months (MID) and 6 months (END).

506

507 ***In vivo* localized proton magnetic resonance spectra (<sup>1</sup>H-MRS).** As for the MRI scanning,  
508 animals were anesthetized using isoflurane, respiration was monitored, and core body  
509 temperature maintained at 37°C during scanning. In addition, heart beats were recorded using  
510 an electrocardiogram system. Localized proton magnetic resonance spectra (<sup>1</sup>H-MRS) from  
511 the liver (n=5-7 per group) were acquired from a 2x2x2 mm<sup>3</sup> voxel localized in the left lobe  
512 with excitation synchronized to the first R-wave within the expiration period, as detailed<sup>55,56</sup>.  
513 Spectroscopy data were processed using the LCModel analysis software ([http://s-  
514 provencher.com/pub/LCModel/manual/manual.pdf](http://s-provencher.com/pub/LCModel/manual/manual.pdf)). “Liver 9” was used as a base with all  
515 signals occurring in the spectral range of 0 to 7 ppm (water resonance at 4.7ppm) simulated  
516 in LCModel. All concentrations were derived from the area of the resonance peaks of the  
517 individual metabolites. Only the fitting results with an estimated standard deviation of less than  
518 20% were further analyzed. <sup>1</sup>H-MRS spectra revealed nine lipid signals (peaks) in the mouse  
519 liver. Peak assignments were based on published data<sup>55,56</sup>. As for the MRI, <sup>1</sup>H-MRS  
520 experiments were repeated twice on the same animal at MID and END.

521

522 ***In vivo* metabolic tolerance tests.** At MID and END, F1 mice were fasted for 6h prior to the  
523 oral glucose tolerance test (OGTT) and for 4h prior to the insulin tolerance test (ITT), both  
524 performed as detailed<sup>57</sup>. Briefly, at time zero (T0) peripheral glucose level was measured at  
525 the tail using a One-Touch ultra-glucometer (AccuChek Sensor, Roche Diagnostics) and at  
526 T15, T30, T60 and T120 min. For the OGTT, extra blood was collected at each time-point and  
527 later plasma was separated by centrifugation (15min at 2,000 RPM) and stored at -80 °C for  
528 insulin measurement using a Rat/Mouse Insulin Elisa kit (EMD Millipore - EZRMI13K).  
529 Prior to sacrifice, mice were fasted for 2h and anesthetized with 4% isoflurane. Blood glucose  
530 level was measured with a OneTouch Ultra glucometer (AccuChek Sensor, Roche  
531 Diagnostics). Subsequently, mice were exsanguinated via cardiac puncture and blood saved  
532 for plasma analysis. The whole liver was quickly removed and washed into PBS. Several  
533 pieces of left lobe of the liver were collected, fresh-frozen into liquid nitrogen and stored at -  
534 80°C until further analysis.

535

536 **Liver histology.** For hematoxylin and eosin (H&E) staining, the livers were frozen in OCT  
537 embedding matrix and on dry ice. Sectioning and staining were done according to standard  
538 histological procedures.

539

540 **Biochemical analysis of plasma.** Within 15 min after blood collection, plasma was separated  
541 by centrifugation (15min at 2,000 RPM). Plasma total triglycerides (Total TG) and total  
542 cholesterol (Total Chol) were measured by enzymatic assay using commercially available kits  
543 (Roche Diagnostics GmbH, Mannheim and mti Diagnostic GmbH, Idstein, Germany).  
544 Cholesterol lipoprotein fractions in serum were determined as described<sup>58</sup>. Briefly, sera from  
545 each individual mouse were separated by size exclusion chromatography using a Superose  
546 and PC 3.2/30 column (Pharmacia Biotech, Uppsala, Sweden). Reagent (Roche Diagnostic,  
547 Mannheim, Germany) was directly infused into the eluate online and the absorbance was  
548 measured. The concentration of the different lipoprotein fractions was calculated from the area  
549 under the curves of the elution profiles by using the EZChrom Elite software (Scientific

550 Software; Agilent Technologies, Santa Clara, CA).

551

552 **Immunoassay for adipokine levels.** Within 15 min after blood collection, plasma was  
553 separated by centrifugation (15min at 2,000 RPM). A Multiplexed bead immunoassay was  
554 used to measure adipokine levels using a commercially available kit (Bio-Plex Pro Mouse  
555 Diabetes 8-Plex Assay #171F7001M) according to manufacturer's instructions.

556

557 **Lipidomic.**

558 *Fatty acid analysis using gas chromatography – mass spectrometry (GC-MS).* Total lipid  
559 extracts were obtained using a modified Bligh and Dyer method<sup>59</sup> and after transmethylation,  
560 the fatty acids were analyzed by gas chromatography followed by mass spectrometry (GC-  
561 MS)<sup>60,61</sup>. Aliquots of the lipid extracts corresponding to 2.5 µg of total phospholipid, were  
562 transferred into glass tubes and dried under a nitrogen stream. Resulting lipid films were  
563 dissolved in 1 mL of *n*-hexane containing a C19:0 as internal standard (1.03 µg mL<sup>-1</sup>, CAS  
564 number 1731-94-8, Merck, Darmstadt, Germany) with addition of 200 µL of a solution of  
565 potassium hydroxide (KOH, 2 M) in methanol, followed by 2 min vortex. Then, 2 mL of a  
566 saturated solution of sodium chloride (NaCl) was added, and the resulting mixture was  
567 centrifuged for 5 minutes at 626 x g for phase separation. Cholesterol was removed from the  
568 organic phase according to the Lipid Web protocol  
569 (<https://lipidhome.co.uk/ms/basics/msmeprep/index.htm>). A 1 cm silica column in a pipette tip  
570 with wool was pre-conditioned with 5 mL of hexane (high-performance liquid chromatography  
571 (HPLC) grade). Methyl esters were added to the top of the tip and recovered by elution with  
572 hexane:diethyl ether (95:5, v/v, 3 mL), and thereafter dried under a nitrogen current. Fatty acid  
573 methyl esters (FAMES) were dissolved in 100 µL, and 2.0 µL were injected in GC-MS (Agilent  
574 Technologies 8860 GC System, Santa Clara, CA, USA). GC-MS was equipped with a DB-  
575 FFAP column (30m long, 0.32 mm internal diameter, and 0.25 µm film thickness (J & W  
576 Scientific, Folsom, CA, USA)). The GC equipment was connected to an Agilent 5977B Mass  
577 Selective Detector operating with an electron impact mode at 70 eV and scanning the range

578  $m/z$  50–550 in a 1 s cycle in a full scan mode acquisition. Oven temperature was programmed  
579 from an initial temperature of 58°C for 2 min, a linear increase to 160°C at 25°C min<sup>-1</sup>, followed  
580 by linear increase at 2°C min<sup>-1</sup> to 210 °C, then at 20 °C min<sup>-1</sup> to 225°C, standing at 225°C for  
581 20 min. Injector and detector temperatures were set to 220 and 230°C, respectively. Helium  
582 was used as the carrier gas at a flow rate of 1.4 mL min<sup>-1</sup>. GCMS5977B/Enhanced Mass  
583 Hunter software was used for data acquisition. To identify fatty acids (FA), the acquired data  
584 were analysed using the qualitative data analysis software Agilent MassHunter Qualitative  
585 Analysis 10.0. FA identification was performed by MS spectrum comparison with the chemical  
586 database NIST library and confirmed with the literature.

587 The total  $\omega$ -3 content was calculated as the summed total of  $\omega$ -3 PUFA of C18:3 $\omega$ -3, C20:5 $\omega$ -  
588 3, C22:5 $\omega$ -3 and C22:6 $\omega$ -3. Total  $\omega$ -6 content was calculated as the summed total of C18:2 $\omega$ -  
589 6, C18:3 $\omega$ -6, C20:2 $\omega$ -6, C20:3 $\omega$ -6 and C20:4 $\omega$ -6 contents. Total  $\omega$ -9 MUFA were calculated  
590 as the summed of C16:1 $\omega$ -9 and C18:1 $\omega$ -9 contents. Total  $\omega$ -11 MUFA were calculated as  
591 the summed of C16:1 $\omega$ -11 and C18:1 $\omega$ -11 contents.

592

593 *Phospholipids (PL), sphingolipids (SL) and triglycerides (TG) analysis by Liquid*  
594 *Chromatography - Mass Spectrometry.* Total lipid extracts from the left lobe of the liver were  
595 separated using a HPLC system (Ultimate 3000 Dionex, Thermo Fisher Scientific, Bremen,  
596 Germany) with an autosampler coupled online to a Q-Exactive hybrid quadrupole Orbitrap  
597 mass spectrometer (Thermo Fisher Scientific, Bremen, Germany), adapted from<sup>59,62</sup>. Briefly,  
598 the solvent system consisted of two mobile phases: mobile phase A (ACN/MeOH/water  
599 50:25:25 (v/v/v) with 2.5 mM ammonium acetate) and mobile phase B (ACN/MeOH 60/40 (v/v)  
600 with 2.5 mM ammonium acetate). Initially, 10% of mobile phase A was held isocratically for 2  
601 min, followed by a linear increase to 90% of A within 13 min and a maintenance period of 2  
602 min, returning to the initial conditions in 3 min, followed by a re-equilibration period of 10 min  
603 prior to the next injection. Five  $\mu$ g of phospholipid (PL) from total lipid extracts were mixed with  
604 4  $\mu$ L of phospholipid standard mixture (dMPC - 0.02  $\mu$ g, dMPE - 0.02  $\mu$ g, SM - 0.02  $\mu$ g, LPC -  
605 0.02  $\mu$ g, TMCL - 0.08  $\mu$ g, dPPI - 0.08  $\mu$ g, dMPG - 0.012  $\mu$ g, dMPS - 0.04  $\mu$ g, Cer - 0.04  $\mu$ g,

606 dMPA - 0.08  $\mu\text{g}$ ) and 91  $\mu\text{L}$  of solvent system (90% of eluent B and 10% of eluent A). Five  $\mu\text{L}$   
607 of each dilution were introduced into the AscentisSi column (10 cm  $\times$  1 mm, 3  $\mu\text{m}$ , Sigma-  
608 Aldrich, Darmstadt, Germany) with a flow rate of 50  $\mu\text{L min}^{-1}$ . The temperature of the column  
609 oven was maintained at 35  $^{\circ}\text{C}$ . The mass spectrometer with Orbitrap technology operated in  
610 positive (electrospray voltage 3.0 kV) and negative (electrospray voltage  $-2.7$  kV) ion modes  
611 with a capillary temperature of 250  $^{\circ}\text{C}$ , a sheath gas flow of 15 U, a high resolution of 70 000  
612 and AGC target 1e6. In MS/MS experiments, cycles consisted of one full scan mass spectrum  
613 and ten data-dependent MS/MS scans (resolution of 17 500 and AGC target of 1e5), acquired  
614 in each polarity. Cycles were repeated continuously throughout the experiments with the  
615 dynamic exclusion of 60 s and an intensity threshold of 2e4. Normalized collisional energy  
616 ranged between 20, 25, and 30 eV.

617

618 *Reagents/Chemicals for LC-MS analysis.* Phospholipid internal standards 1,2-dimyristoyl-*sn*-  
619 glycerol-3-phosphocholine (dMPC), 1-nonadecanoyl-2-hydroxy-*sn*-glycerol-3-phosphocholine  
620 (LPC), 1,2-dimyristoyl-*sn*-glycerol-3-phosphoethanolamine (dMPE), N-palmitoyl-D-*erythro*-  
621 sphingosylphosphorylcholine (NPSM – SM d18:1/17:0), N-heptadecanoyl-D-*erythro*-  
622 sphingosine (Cer d18:1/17:0), 1,2-dimyristoyl-*sn*-glycerol-3-phospho-(10-*rac*-)glycerol  
623 (dMPG), 1,2-dimyristoyl-*sn*-glycerol-3-phospho-L-serine (dMPS), tetramyristoylcardiolipin  
624 (TMCL), 1,2-dimyristoyl-*sn*-glycerol-3-phosphate (dMPA) and 1,2-dipalmitoyl-*sn*-glycerol-3-  
625 phosphatidylinositol (dPPI) were purchased from Avanti Polar Lipids, Inc. (Alabaster, AL).  
626 HPLC grade dichloromethane, methanol and acetonitrile were purchased from Fisher  
627 scientific (Leicestershire, UK). All the reagents and chemicals used were of the highest grade  
628 of purity commercially available and were used without further purification. The water was of  
629 Milli-Q purity (Synergy®, Millipore Corporation, Billerica, MA).

630

631 Spectra were analyzed in positive and negative mode, depending on the lipid class.  
632 Ceramides (Cer), glucosylceramides (GlcCer), phosphatidylethanolamine (PE), lyso  
633 phosphatidylethanolamine (LPE), phosphatidylcholine (PC), lysophosphatidylcholine (LPC),



634 and sphingomyelin (SM) were analyzed in the LC-MS spectra in the positive ion mode, and  
635 identified as  $[M+H]^+$  ions, while cardiolipin (CL), phosphatidylserine (PS), phosphatidylinositol  
636 (PI), lysophosphatidylinositol (LPI) and phosphatidylglycerol (PG) species were analyzed in  
637 negative ion mode, and identified as  $[M-H]^-$  ions. Molecular species of triacylglycerol (TG)  
638 were also analyzed in positive ion mode as  $[M+NH_4]^+$  ions. Data acquisition was carried out  
639 using the Xcalibur data system (V3.3, Thermo Fisher Scientific, USA). The mass spectra were  
640 processed and integrated through the MZmine software (v2.32)<sup>63</sup>. This software allows for  
641 filtering and smoothing, peak detection, alignment and integration, and assignment against an  
642 in-house database, which contains information on the exact mass and retention time for each  
643 PL, Cer and TG molecular species. During the processing of the data by MZmine, only the  
644 peaks with raw intensity higher than  $1e4$  and within 5 ppm deviation from the lipid exact mass  
645 were considered. The identification of each lipid species was validated by analysis of the LC-  
646 MS/MS spectra. The product ion at  $m/z$  184.07 ( $C_5H_{15}NO_4P$ ), corresponding to  
647 phosphocholine polar head group, observed in the MS/MS spectra of the  $[M+H]^+$  ions allowed  
648 to pinpoint the structural features of PC, LPC and SM molecular species under MS/MS  
649 conditions<sup>59</sup>, which were further differentiated based on  $m/z$  values of precursor ions and  
650 characteristic retention times. PE and LPE molecular species ( $[M+H]^+$  ions) were identified by  
651 MS/MS based on the typical neutral loss of 141 Da ( $C_2H_8NO_4P$ ), corresponding to  
652 phosphoethanolamine polar head group. These two classes were also differentiated based on  
653  $m/z$  values of precursor ions and characteristic retention times. The  $[M+H]^+$  ions of Cer and  
654 GlcCer molecular species were identified by the presence of product ions of sphingosine  
655 backbone in MS/MS spectra, such as ions at  $m/z$  264.27 ( $C_{18}H_{34}N$ ) and 282.28 ( $C_{18}H_{36}NO$ )  
656 for sphingosine d18:1<sup>64</sup>, together with the information on  $m/z$  values of precursor ions and  
657 characteristic retention times. The PG molecular species were identified by the  $[M-H]^-$  ions  
658 and based on the product ions identified in the corresponding MS/MS spectra, namely the  
659 product ions at  $m/z$  152.99 ( $C_3H_6O_5P$ ) and 171.01 ( $C_3H_8O_6P$ ). PI and LPI, also identified as  
660  $[M-H]^-$  ions, were confirmed the product ions at  $m/z$  223.00 ( $C_6H_8O_7P$ ), 241.01 ( $C_6H_{10}O_8P$ ),  
661 297.04 ( $C_9H_{14}O_9P$ ) and 315.05 ( $C_9H_{16}O_{10}P$ ), which all derived from phosphoinositol polar head

662 group<sup>59,65</sup>. The  $[M-H]^-$  ions of PS molecular species were identified based on product ions at  
663  $m/z$  152.99 ( $C_3H_6O_5P$ ) in MS/MS spectra, retention time and  $m/z$  values of precursor ions. CL  
664 molecular species ( $[M-H]^-$  ions) were characterized by MS/MS with identification of ions at  
665  $m/z$  152.99 ( $C_3H_6O_5P$ ), carboxylate anions of fatty acyl chains ( $RCOO^-$ ), product ions  
666 corresponding to phosphatidic acid anion and phosphatidic acid anion plus 136 Da as  
667 previously reported<sup>65</sup>. Negative ion mode MS/MS data were used to identify the fatty acid  
668 carboxylate anions  $RCOO^-$ , which allowed the assignment of the fatty acyl chains esterified  
669 to the PL precursor. The MS/MS spectra of  $[M+NH_4]^+$  ions of TGs allowed the assignment of  
670 the fatty acyl substituents on the glycerol backbone<sup>66</sup>.

671

672 **Unsupervised clustering.** The raw data matrix of the lipid spectra was distributed column-  
673 wise by sample IDs and row-wise by PL names. The TMM method was used to normalize  
674 between samples<sup>67</sup>. Unsupervised clustering was then performed using the principal  
675 component analysis (PCA) plot option in R. The PCA plot is based on the two most variant  
676 dimensions in which the PL parameters with duplicated data are filtered out.

677

### 678 **RNA isolation, purity and integrity determination**

679 Liver, SAT and VAT total RNA was extracted using QIAGEN miRNeasy Mini Kit (217004,  
680 Qiazol). RNA concentration was measured by nanodrop®. RNA was treated with RNase-free  
681 DNase (79254) according to the manufacturer's instructions. cDNA libraries were prepared  
682 for bulk-RNA sequencing as previously detailed<sup>15</sup>.

683

### 684 **Bulk RNA-seq mapping**

685 All raw sequence reads available in FastQ format were mapped to the mouse genome (mm10)  
686 using Tophat2 with Bowtie2 option<sup>68,69</sup>, as described previously<sup>15</sup>. Raw read counts for each  
687 gene were calculated using featureCounts from the subread package<sup>70</sup>.

688

## 689 **Bulk RNA-seq differential gene expression analysis**

690 A differential gene expression analysis was performed using DEseq2<sup>71</sup>. The differentially  
691 expressed genes (DEG) were identified by adjusted  $p$ -value for multiple testing using  
692 Benjamini-Hochberg correction with False Discovery Rate (FDR) values less than 0.1.

693

## 694 **Pathway analysis**

695 A Gene Set Enrichment Analysis (GSEA) was performed using the KEGG pathways  
696 dataset. Genes were ranked in descending order according to the  $\log_2$  fold change ( $\log_2FC$ )  
697 of expression. Differences between the ranks of genes in a pathway were compared to  
698 other genes. For each queried pathway,  
699 if gene  $i$  is a member of the pathway, it is defined as:

$$700 \quad X_i = \sqrt{\frac{N-G}{G}}$$

701 if gene  $i$  is not a member of the pathway, it is defined as:

$$702 \quad X_i = -\sqrt{\frac{G}{N-G}}$$

703 here  $N$  is the total number of genes and  $G$  indicates the number of genes in the query  
704 pathway. Next, a max running sum across all  $N$  genes Maximum Estimate Score (MES) is  
705 calculated as:

$$706 \quad MES = \max_{1 \leq j \leq N} \sum_{i=1}^j X_i$$

707 The permutation test was performed with 1000 times to judge the significance of MES  
708 values. The queried pathway with a nominal  $p$ -value less than 0.05 and FDR values less  
709 than 0.1 are considered to be significantly enriched. The positive MES value indicates  
710 enrichment (up-regulation) whereas a negative MES value indicates depletion (down-  
711 regulation) of a pathway activity.

712

## 713 **Gene Ontology (GO) enrichment analysis**

714 Gene Ontology enrichment analysis is performed using online software AmiGO website  
715 (<http://amigo.geneontology.org/amigo>), where the significant enrichment GO terms was  
716 identified using Fisher's Exact test with P values  $\leq 0.05$ .

717

### 718 **Statistical analyses**

719 Data are expressed as mean  $\pm$  sem. Differences between the four group (female and male  
720 offspring sex and C and HF diet mother groups (F-C/HF, M-C/HF, F-HF/HF and M-HF/HF)  
721 were determined using two-way ANOVA with diet (D) and sex (S) as independent variables,  
722 followed by Tukey's multiple comparison post hoc test when significant ( $p < 0.05$ ).

723 Differences between two groups (sexes, F *versus* M; maternal diet C/HF *versus* HF/HF) were  
724 determined by t-test corrected for multiple comparisons using the Holm-Sidak method, with  
725 alpha=5.000%. \*,  $p < 0.05$  M vs F and #,  $p < 0.05$  HF/HF vs C/HF were considered significant. \*\*  
726 or ##,  $p < 0.01$ ; \*\*\* or ###,  $p < 0.001$ .

727

### 728 **Acknowledgements**

729 The MRI and MRS experiments were performed at the Department of Comparative  
730 Medicine/Karolinska Experimental Research and Imaging Centre at Karolinska University  
731 Hospital, Solna, Sweden. We thank Peter Damberg and Sahar Nikkhou Aski for excellent  
732 assistance to develop the sequence for proton-magnetic resonance spectroscopy in the liver.  
733 We thank Ingela Arvidsson for excellent help at the FLPC for lipoprotein profiling. We thank  
734 Byambajav Buyandelger, Sonja Gustafsson, Jianping Liu from the single cell facility,  
735 Karolinska institute in Huddinge for excellent assistance for the SmartSeq2 experiment. This  
736 work and M.K.A. were supported by the Novo Nordisk Foundation (NNF14OC0010705), by  
737 the Lisa and Johan Grönbergs Foundation (2019-00173) and by AstraZeneca (ICMC). L.A.H.  
738 is supported by grants from FCT - Fundação para a Ciência e a Tecnologia  
739 (UID/BIM/04501/2020), CCDRC (CENTRO-01-0145-FEDER-000003) and CCDRC

740 (CENTRO-01-0246-FEDER-000018), M.R.D., D.C. and T.M. are supported by CESAM  
741 (UIDP/50017/2020+UIDB/50017/2020) and LAQV/REQUIMTE (UIDB/50006/2020). Fetus in  
742 Fig.1a was created by Servier Medical Art “newborn mouse.” In Fig.6, lipoprotein cells were  
743 designed using Servier Medical Art “lipids” <http://smart.servier.com/>. Open Access licensed  
744 under a Creative Common Attribution 3.0 Generic  
745 License <https://creativecommons.org/licenses/by/3.0/legalcode>.

746

### 747 **Author Contributions**

748 M.K.A. conceptualized and designed the study. C.S., M.G.G and M.K.A. performed animal  
749 experiments; C.S. and M.K.A. collected and analyzed all generated data; L.H., D.C., T.M. and  
750 M.R.D. performed the lipidomics and wrote the method for lipidomic; C.S. performed RNA  
751 sequencing experiments; C.S. and X.L. performed the bioinformatics; C.S. and M.K.A.  
752 designed the figures and wrote the manuscript; B.A. and C.K. substantially participated to the  
753 manuscript review. The manuscript was edited and approved by all authors. M.K.A is the  
754 guarantor of this work and, as such, had full access to all the data in the study and takes  
755 responsibility for the integrity of the data and the accuracy of the data analysis. All authors  
756 approved the final version of the manuscript.

### 757 **Competing interest**

758 The authors declare no competing interest regarding this work.

759

### 760 **Data availability**

761 The raw data generated for lipidomics and RNA sequencing are available as described below

762 For VAT and SAT RNA sequencing, SRA data: PRJNA662930

763 For Liver RNA sequencing, SRA data: PRJNA723771

764 For the lipidomic, SRA data: <https://figshare.com/s/ac91b57eaa0f5c560d3d>

765

766

767 **Figure legends**

768 **Fig. 1 Sex-dependent physiological and transcriptional adaptations to maternal obesity**

769 **in obese F1 offspring. a** Graphic description of the study set-up. Dam-F0 were fed either the

770 control diet (C, green arrow) or the high-fat diet (HF, orange arrow) for 6 weeks prior mating

771 and continued on the same diet during gestation and lactation; male-F0 remained on C diet

772 until mating. Both female and male F1 offspring remained on HF diet after weaning until

773 sacrifice. The offspring physiological status was assessed *in vivo* at 3 months (MID) and 6

774 months (END) of age, using each animal as its own control. Explanatory scheme of the two-

775 way ANOVA statistical comparisons presented on the right; **b** Time series plot of body weight

776 in female (F, red circle; open circle in C/HF and full circle in HF/HF) and male (M, blue triangle;

777 open triangle in C/HF and full triangle in HF/HF) offspring until sacrifice; **c-g** Bar graphs of the

778 **c** Total fat, **d** Visceral (VAT), **e** Whole body subcutaneous (SAT) adipose tissues, **f** Abdominal

779 SAT (Abd SAT) and **g** The ratio of total SAT on Abd SAT in F-C/HF (red open bars), M-C/HF

780 (blue open bars), F-HF/HF (red striped bars) and M-HF/HF (blue striped bars) based on

781 MRI images analysis. **h-m** Time-course of the circulating glucose levels and the corresponding

782 insulin levels during the oral glucose tolerance test (OGTT) at, **h** and **i** MID and **k** and **l** END

783 together with the area under the curve (AUC); Circulating glucose levels after insulin injection

784 at **j** MID and **m** END together with the AUC; **n** Bar plot presenting the Maximum Estimate

785 Score (MES) between sexes in C/HF and HF/HF offspring and in response to MO in F and M

786 of the selected KEGG pathways involved in insulin and glucose metabolism; red and blue bars

787 indicate higher expression in males and females, respectively, and green and purple bars

788 indicate higher expression in C/HF and HF/HF, respectively; **o** Box plots of the expression

789 level (RPKM,  $\log_{10}$ ) of genes involved in the insulin pathways. For **b** F-C/HF ( $n=11$ ), M-C/HF

790 ( $n=13$ ), F-HF/HF ( $n=11$ ) and M-HF/HF ( $n=10$ ). For **c-g** F-C/HF ( $n=7$ ), M-C/HF ( $n=6$ ), F-

791 HF/HF ( $n=7$ ) and M-HF/HF ( $n=7$ ). For **h-m** F-C/HF ( $n=8$ ), M-C/HF ( $n=9$ ), F-HF/HF ( $n=7$ )

792 and M-HF/HF ( $n=6$ ). For **n-o** F-C/HF ( $n=5$ ), M-C/HF ( $n=5$ ), F-HF/HF ( $n=6$ ) and M-HF/HF

793 ( $n=3$ ). Data are presented as mean  $\pm$  sem. Two-way ANOVA (sex (S), mother diet (D),

794 interaction (I) between sex and diet, and (ns) for not significant) followed by Tukey's multiple  
795 comparisons test when significant ( $p < 0.05$ ). Differences between two groups (sexes, F  
796 versus M; maternal diet, C/HF versus HF/HF) were determined by unpaired t-test corrected  
797 for multiple comparisons using the Holm–Sidak method, with  $\alpha = 5.000\%$ . For pathway  
798 and DEG analysis we used the Benjamini-Hochberg correction with false Discovery Rate  
799 (FDR) values less than 0.1 when significant. \*, M versus F and #, HF/HF versus C/HF,  $p < 0.05$ ;  
800 \*\* or ##,  $p < 0.01$ ; \*\*\* or ###,  $p < 0.001$ .

801 RPKM: Reads Per Kilobase of transcript, per Million mapped reads.

802

803 **Fig. 2. Maternal obesity adjusts the triglyceride composition in the liver of offspring and**  
804 **causes sex-dependent transcriptional alterations.** Female (F, red bars) and male (M, blue  
805 bars) offspring born from C diet mothers (C/HF, open bars) and from HF diet mothers (HF/HF,  
806 striped bars) at MID and END. **a** Representative axial image of the liver with single voxel  
807 spectroscopy and one representative proton spectrum used for *in vivo* quantification of the  
808 fraction of **b** lipid mass (fLM), **c** saturated lipids (fSL), **d** monounsaturated lipids (fMUL) and  
809 **e** polyunsaturated lipids (fPUL). Relative abundance of TG groups in the liver categorized as  
810 **f** low **g** moderate and **h** high abundant; **i** Bar plot of the TG species in liver extracts; **j** Pie  
811 charts showing the hepatic TG saturation profile in F and M in C/HF and HF/HF groups; **k** Bar  
812 plot presenting the MES between sexes in C/HF and HF/HF and in response to MO in F and  
813 M of the KEGG pathways involved in the FA and TG metabolism. Red and blue bars indicate  
814 higher expression in M and F, respectively and, green and purple bars indicate higher  
815 expression in C/HF and HF/HF groups, respectively. **l** Heatmap of the log<sub>2</sub> fold change  
816 expression levels of the *Acsf* family genes and **m** Box plots showing expression (RPKM, log<sub>10</sub>)  
817 of genes involved in the FA and TG pathways. For **b–e** F-C/HF ( $n = 5$ ), M-C/HF ( $n = 9$ ), F-  
818 HF/HF ( $n = 5$ ) and M-HF/HF ( $n = 5$ ). For **f–j** F-C/HF ( $n = 4$ ), M-C/HF ( $n = 4$ ), F-HF/HF ( $n = 4$ ) and  
819 M-HF/HF ( $n = 3$ ). For **k–m** F-C/HF ( $n = 5$ ), M-C/HF ( $n = 5$ ), F-HF/HF ( $n = 6$ ) and M-HF/HF ( $n = 3$ ).  
820 Data are presented as mean  $\pm$  sem. Two-way ANOVA (sex (S), mother diet (D), interaction (I)  
821 between sex and diet, and (ns) for not significant) followed by Tukey's multiple comparisons

822 test when significant ( $p < 0.05$ ). Differences between two groups (sexes, F versus M; maternal  
823 diet C/HF versus HF/HF) were determined by unpaired t-test corrected for multiple  
824 comparisons using the Holm–Sidak method, with alpha = 5.000%. For pathway and DEG  
825 analysis we used the Benjamini-Hochberg correction with FDR < 0.1, when significant. \*, M  
826 versus F and #, HF/HF versus C/HF,  $p < 0.05$ ; \*\* or ##,  $p < 0.01$ ; \*\*\* or ###,  $p < 0.001$ .

827

828 **Fig.3. Hepatic phospholipid composition is sex-dependent in offspring regardless of**  
829 **maternal diet. a** Principal component analysis (PCA) plot of the phospholipid profile in liver  
830 extracts; **b** Chart representing relative abundancies of all PL classes categorized in low (inner  
831 layer of the chart) and major classes (outer part of the chart); Heatmaps presenting the log10  
832 fold change between sexes in C/HF and HF/HF (red and blue boxes) and in response to MO  
833 in F and M (green and purple boxes) of the **c** phosphatidylcholine (PC) and **d**  
834 phosphatidylethanolamine (PE) lipid classes; **e** Bubble charts showing the log10 fold change  
835 difference of the saturation profile in PC and PE classes between sexes (C/HF and HF/HF  
836 columns, white background) and in response to MO (F and M columns, grey background);  
837 Heatmap presenting the log10 fold change between sexes in C/HF and HF/HF and in  
838 response to MO in F and M of the **f** lysoPC (LPC), **g** lysoPE (LPE), **j** phosphatidylserine (PS),  
839 **l** phosphoglycerides (PG), **n** cardiolipin (CL), **p** phosphatidylinositol (PI), **r** ceramide (Cer) and  
840 **t** sphingomyelin (SM) lipid species; Bubble charts showing the log10 fold change difference  
841 of the saturation profile in **h** LPC, **i** LPE, **k** PS, **m** PG, **o** CL, **q** PI and **s** Cer classes between  
842 sexes (C/HF and HF/HF columns, white background) and in response to MO (F and M  
843 columns, grey background); **u** Chord graph presenting the genes associated with phospholipid  
844 pathways. The significant differential expression of each gene based on log2 fold change is  
845 presented as i) red boxes for upregulation in M, ii) blue boxes for upregulation in F, iii) green  
846 boxes for upregulation in C/HF iv) purple boxes for upregulation in HF/HF and v) white boxes  
847 when not significant. For **a-t** F-C/HF ( $n=4$ ), M-C/HF ( $n=4$ ), F-HF/HF ( $n=4$ ) and M-HF/HF  
848 ( $n=3$ ). For **u** F-C/HF ( $n=5$ ), M-C/HF ( $n=5$ ), F-HF/HF ( $n=6$ ) and M-HF/HF ( $n=3$ ). For gene  
849 expression analysis (**3u**) we used the Benjamini-Hochberg correction with FDR < 0.1, when



850 significant. Data are presented as mean  $\pm$  sem. Differences between two groups (sexes, F  
851 versus M; maternal diet C/HF versus HF/HF) were determined by unpaired t-test corrected for  
852 multiple comparisons using the Holm–Sidak method, with alpha = 5.000%. \*, M versus F and #,  
853 HF/HF versus C/HF,  $p < 0.05$ ; \*\* or ##,  $p < 0.01$ ; \*\*\* or ###,  $p < 0.001$ .

854

855 **Fig. 4. MO promotes hepatic inflammatory response in obese male's offspring.**

856 **a** Hematoxylin-eosin (H&E) staining of frozen liver sections from C/HF and HF/HF offspring;  
857 **b** Venn diagram of the DEG in response to MO, in females (F) and males (M) and; Volcano  
858 plots of the DEG in response to MO in **c** F and **d** M; **e** Venn diagram of DEG between sexes  
859 in C/HF and HF/HF and; Volcano plots of the DEG between sexes in **f** C/HF and **g** HF/HF;  
860 Top 10 significantly up and top 10 significantly down enriched biological GO terms in response  
861 to MO in **h** F and **i** M; and between sexes in **j** C/HF and **k** HF/HF; **l** Bar plot presenting the  
862 MES between sexes in C/HF and HF/HF and in response to MO in F and M of the KEGG  
863 pathways involved in inflammation. Red and blue bars indicate higher expression in M and F,  
864 respectively and, green and purple bars indicate higher expression in C/HF and HF/HF  
865 groups, respectively. **m** Box plots showing expression (RPKM, log<sub>10</sub>) of selected genes  
866 involved in the inflammatory pathways. For volcano plots: Significantly upregulated  
867 ( $\log_2FC > 1$ ) and downregulated ( $\log_2FC < -1$ ) genes are presented as red and blue dots,  
868 respectively. Orange dots indicate the genes that are significantly changed ( $FDR < 0.1$ ). Black  
869 dots indicate not significant ( $FDR > 0.1$ ). For **a** F-C/HF ( $n = 3$ ), M-C/HF ( $n = 3$ ), F-HF/HF ( $n = 4$ )  
870 and M-HF/HF ( $n = 2$ ). For **b–m** F-C/HF ( $n = 5$ ), M-C/HF ( $n = 5$ ), F-HF/HF ( $n = 6$ ) and M-HF/HF  
871 ( $n = 3$ ). Data are presented as mean  $\pm$  sem. Differences between two groups (sexes, F versus  
872 M; maternal diet C/HF versus HF/HF) were determined by unpaired t-test corrected for  
873 multiple comparisons using the Holm–Sidak method, with alpha = 5.000%. For **h–k**  
874 significance was determined using Fisher's Exact test with P values  $\leq 0.05$ . For pathway and  
875 DEG analysis we used the Benjamini-Hochberg correction with  $FDR < 0.1$  when significant. \*,  
876 M versus F and #, HF/HF versus C/HF,  $p < 0.05$ ; \*\* or ##,  $p < 0.01$ ; \*\*\* or ###,  $p < 0.001$ .

877

878 **Fig. 5 MO has sex-dependent effects on hepatocellular cancer progression in obese**  
879 **offspring. a** Hematoxylin-eosin (H&E) 10x and 40x images from liver sections of F-C/HF, M-  
880 C/HF, F-HF/HF and M-HF/HF; **b** Bar plot presenting the MES between sexes in C/HF and  
881 HF/HF and in response to MO in F and M of the KEGG pathways involved in hepatocellular  
882 carcinoma. Red and blue bars indicate higher expression in M and F respectively and, green  
883 and purple bars indicate higher expression in C/HF and HF/HF groups, respectively. Heatmap  
884 of the log<sub>2</sub> fold change expression levels of the **c** Ugt - gene family and **d** Sult - gene family;  
885 **e-f** Box plots showing expression (RPKM, log<sub>10</sub>) of genes involved in the nominated cancer  
886 pathways. For **a** F-C/HF (*n* = 3), M-C/HF (*n* = 3), F-HF/HF (*n* = 4) and M-HF/HF (*n* = 2). For **b-f**  
887 **f** F-C/HF (*n* = 5), M-C/HF (*n* = 5), F-HF/HF (*n* = 6) and M-HF/HF (*n* = 3). Data are presented as  
888 mean ± sem. Differences between two groups (sexes, F versus M; maternal diet C/HF versus  
889 HF/HF) were determined by unpaired t-test corrected for multiple comparisons using the  
890 Holm–Sidak method, with alpha = 5.000%. For pathway and DEG analysis we used the  
891 Benjamini-Hochberg correction with FDR < 0.1, when significant. \*, M versus F and #, HF/HF  
892 versus C/HF, *p* < 0.05; \*\* or ##, *p* < 0.01; \*\*\* or ###, *p* < 0.001.

893

894 **Fig. 6 Different programmed metabolic effects in the obese female and male offspring**  
895 **exposed to maternal obesity. a** Livers from female offspring demonstrate decreased  
896 lipogenesis and inflammatory pathways, decreased HCC and remodeling of triglyceride  
897 species. Oxidative phosphorylation and browning processes were increased in SAT and VAT,  
898 respectively. Circulating cytokine and lipokine levels, ghrelin, GIP and resistin were higher in  
899 F-HF/HF compared to F-C/HF and to M-HF/HF. Altogether, these metabolic adaptations may  
900 protect the liver from metabolic complications in response to MO; **b** Livers from male offspring  
901 demonstrate hepatic steatosis, impaired insulin sensitivity and increased inflammation  
902 possibly due to negative feedback signaling from the SAT, including a reduction of oxidative  
903 phosphorylation associated with an induction of inflammatory pathways. Arrows represent up-  
904 ↑ and down-↓ regulation. HCC, hepatocellular carcinoma; SAT, subcutaneous adipose tissue;  
905 VAT, visceral adipose tissue; VLDL, very low; LDL, low and HDL, high density lipoproteins.

906

907 **Supplementary Figure S1. Metabolic pathways in liver of offspring.** **a** DEG and differential  
908 pathway activity in response to MO obtained from Smart-seq2 data analysis in subcutaneous  
909 (SAT) and visceral (VAT) adipose tissues of male and female offspring; **b** Clustered heatmap  
910 of all genes obtained from Smart-seq2 in liver between sexes in C/HF and HF/HF (sex) and  
911 in response to MO in F and M (diet); **c** Clustered heatmap of all KEGG pathway enrichment  
912 analysis presenting the MES levels between sexes in C/HF and HF/HF (sex) and in response  
913 to MO in F and M (diet). Data are presented as mean  $\pm$  sem. F-C/HF ( $n=5$ ), M-C/HF ( $n=5$ ),  
914 F-HF/HF ( $n=6$ ) and M-HF/HF ( $n=3$ ).

915

916 **Supplementary Figure S2. Relative abundance of TG species in offspring's liver**  
917 **detected by LC-MS.** Relative abundance of **a** Low abundant short TG; **b** Low abundant long  
918 TG and **c** High abundant TG species detected by LC-MS in F-C/HF (red open bars), M-C/HF  
919 (blue open bars), F-HF/HF (red stripped bars) and M-HF/HF (blue stripped bars). For **a-c** F-  
920 C/HF ( $n=4$ ), M-C/HF ( $n=4$ ), F-HF/HF ( $n=4$ ) and M-HF/HF ( $n=3$ ). Data are presented as  
921 mean  $\pm$  sem. Differences between two groups (sexes, F versus M; maternal diet C/HF versus  
922 HF/HF) were determined by unpaired t-test corrected for multiple comparisons using the  
923 Holm–Sidak method, with alpha = 5.000%. \*, M versus F and #, HF/HF versus C/HF,  $p < 0.05$ ;  
924 \*\* or ##,  $p < 0.01$ ; \*\*\* or ###,  $p < 0.001$ .

925

926 **Supplementary Figure S3. Sex and MO-dependent relative abundance of fatty acid (FA)**  
927 **species in offspring.** **a** Relative abundance of fatty acid (FA) species contained into the total  
928 TG and PL in F-C/HF (red open bars), M-C/HF (blue open bars), F-HF/HF (red stripped bars)  
929 and M-HF/HF (blue stripped bars); Pie charts of the **b**  $\omega$ -3,  $\omega$ -6,  $\omega$ -9 and  $\omega$ -11 FA synthesis  
930 pathways and **c** FA saturation profile in F-C/HF, M-C/HF, F-HF/HF and M-HF/HF; **d** Delta 9  
931 and delta 5 desaturase activity in F-C/HF (red open box), M-C/HF (blue open box), F-HF/HF  
932 (red stripped box) and M-HF/HF (blue stripped box). For **a-d** F-C/HF ( $n=4$ ), M-C/HF ( $n=4$ ),  
933 F-HF/HF ( $n=4$ ) and M-HF/HF ( $n=3$ ). Data are presented as mean  $\pm$  sem. Differences

934 between two groups (sexes, F versus M; maternal diet, C/HF versus HF/HF) were determined  
935 by unpaired t-test corrected for multiple comparisons using the Holm–Sidak method, with  
936 alpha = 5.000%. \*, M versus F and #, HF/HF versus C/HF,  $p < 0.05$ ; \*\* or ##,  $p < 0.01$ ; \*\*\* or ###,  
937  $p < 0.001$ .

938

939 **Supplementary Figure S4. PL lipid species relative abundance in liver.** Relative hepatic  
940 levels of **a** PC and LPC; **b** PE and LPE lipid classes; Low, moderate and high relative levels  
941 of **c** PC and **d** PE species; Low and high relative levels of **e** LPC and **f** LPE species in F-C/HF  
942 (red open bars), M-C/HF (blue open bars), F-HF/HF (red stripped bars) and M-HF/HF (blue  
943 stripped bars). For **a-f** F-C/HF ( $n=4$ ), M-C/HF ( $n=4$ ), F-HF/HF ( $n=4$ ) and M-HF/HF ( $n=3$ ).  
944 Data are presented as mean  $\pm$  sem. Two-way ANOVA (sex (S), mother diet (D), interaction (I)  
945 between sex and diet, and (ns) for not significant) followed by Tukey’s multiple comparisons  
946 test when significant ( $p < 0.05$ ). Differences between two groups (sexes, F versus M; maternal  
947 diet, C/HF versus HF/HF) were determined by unpaired t-test corrected for multiple  
948 comparisons using the Holm–Sidak method, with alpha = 5.000%. \*, M versus F and #, HF/HF  
949 versus C/HF,  $p < 0.05$ ; \*\* or ##,  $p < 0.01$ ; \*\*\* or ###,  $p < 0.001$ .

950

951 **Supplementary Figure S5. Relative abundance of PL lipid classes and species.** Relative  
952 hepatic levels of **a** PS, PG, CL, PI, Cer and SM lipid classes; Low and high relative levels of  
953 **b** PS; **c** PG; **d** CL; **e** PI; **f** Cer; and **g** SM species in C/HF (open bars) and HF/HF (stripped  
954 bars) F (red bars) and M (blue bars). Data are presented as mean  $\pm$  sem. Two-way ANOVA  
955 (sex (S), mother diet (D), interaction (I) between sex and diet, and (ns) for not significant)  
956 followed by Tukey’s multiple comparisons test when significant ( $p < 0.05$ ). Differences  
957 between two groups (sexes, F versus M; maternal diet, C/HF versus HF/HF) were determined  
958 by unpaired t-test corrected for multiple comparisons using the Holm–Sidak method, with  
959 alpha = 5.000%. \*, M versus F and #, HF/HF versus C/HF,  $p < 0.05$ ; \*\* or ##,  $p < 0.01$ ; \*\*\* or ###,  
960  $p < 0.001$ .

961

962 **Supplementary Figure S6. Expression levels of genes involved in hepatic lipid and**  
963 **energy metabolism. a** Box plots showing the expression (RPKM, log10) of genes of the lipid  
964 and energy metabolism pathways. F-C/HF ( $n=5$ ), M-C/HF ( $n=5$ ), F-HF/HF ( $n=6$ ) and M-  
965 HF/HF ( $n=3$ ). Data are presented as mean  $\pm$  sem. For analysis we used the Benjamini-  
966 Hochberg correction with  $FDR < 0.1$ , when significant. \*, M versus F and #, HF/HF versus  
967 C/HF,  $p < 0.05$ ; \*\* or ##,  $p < 0.01$ ; \*\*\* or ###,  $p < 0.001$ .

968

## 969 REFERENCES

- 970 1 Gluckman, P. D., Hanson, M. A., Cooper, C. & Thornburg, K. L. Effect of in utero and  
971 early-life conditions on adult health and disease. *N Engl J Med* **359**, 61-73,  
972 doi:10.1056/NEJMra0708473 (2008).
- 973 2 Shankar, K. *et al.* Maternal obesity at conception programs obesity in the offspring. *Am*  
974 *J Physiol Regul Integr Comp Physiol* **294**, R528-538, doi:10.1152/ajpregu.00316.2007  
975 (2008).
- 976 3 Godfrey, K. M. *et al.* Influence of maternal obesity on the long-term health of offspring.  
977 *Lancet Diabetes Endocrinol* **5**, 53-64, doi:10.1016/S2213-8587(16)30107-3 (2017).
- 978 4 Mingrone, G. *et al.* Influence of maternal obesity on insulin sensitivity and secretion in  
979 offspring. *Diabetes Care* **31**, 1872-1876, doi:10.2337/dc08-0432 (2008).
- 980 5 Cerdo, T. *et al.* Maternal obesity is associated with gut microbial metabolic potential in  
981 offspring during infancy. *J Physiol Biochem* **74**, 159-169, doi:10.1007/s13105-017-  
982 0577-x (2018).
- 983 6 Mouralidarane, A. *et al.* Maternal obesity programs offspring nonalcoholic fatty liver  
984 disease by innate immune dysfunction in mice. *Hepatology* **58**, 128-138,  
985 doi:10.1002/hep.26248 (2013).
- 986 7 Zambrano, E. *et al.* Maternal Obesity: Lifelong Metabolic Outcomes for Offspring from  
987 Poor Developmental Trajectories During the Perinatal Period. *Arch Med Res* **47**, 1-12,  
988 doi:10.1016/j.arcmed.2016.01.004 (2016).
- 989 8 Kessler, E. L., Rivaud, M. R., Vos, M. A. & van Veen, T. A. B. Sex-specific influence  
990 on cardiac structural remodeling and therapy in cardiovascular disease. *Biol Sex Differ*  
991 **10**, 7, doi:10.1186/s13293-019-0223-0 (2019).
- 992 9 Kurt, Z. *et al.* Tissue-specific pathways and networks underlying sexual dimorphism in  
993 non-alcoholic fatty liver disease. *Biol Sex Differ* **9**, 46, doi:10.1186/s13293-018-0205-  
994 7 (2018).
- 995 10 Lonardo, A. & Suzuki, A. Sexual Dimorphism of NAFLD in Adults. Focus on Clinical  
996 Aspects and Implications for Practice and Translational Research. *J Clin Med* **9**,  
997 doi:10.3390/jcm9051278 (2020).
- 998 11 Vasanthakumar, A. *et al.* Sex-specific adipose tissue imprinting of regulatory T cells.  
999 *Nature* **579**, 581-585, doi:10.1038/s41586-020-2040-3 (2020).
- 1000 12 Link, J. C., Chen, X., Arnold, A. P. & Reue, K. Metabolic impact of sex chromosomes.  
1001 *Adipocyte* **2**, 74-79, doi:10.4161/adip.23320 (2013).
- 1002 13 Faulkner, J. L. & Belin de Chantemele, E. J. Sex hormones, aging and cardiometabolic  
1003 syndrome. *Biol Sex Differ* **10**, 30, doi:10.1186/s13293-019-0246-6 (2019).

- 1004 14 Savva, C. *et al.* Obese mother offspring have hepatic lipidic modulation that contributes  
1005 to sex-dependent metabolic adaptation later in life. *Commun Biol* **4**, 14,  
1006 doi:10.1038/s42003-020-01513-z (2021).
- 1007 15 Savva, C. *et al.* Maternal obesity programs white and brown adipose tissue  
1008 transcriptome and lipidome in offspring in a sex-dependent manner. *Preprint at*  
1009 *bioRxiv*, <https://doi.org/10.1101/2021.02.08.430188> (2021).
- 1010 16 Sahagun, E., Bachman, B. B. & Kinzig, K. P. Sex-specific effects of ketogenic diet  
1011 after pre-exposure to a high-fat, high-sugar diet in rats. *Nutr Metab Cardiovasc Dis* **31**,  
1012 961-971, doi:10.1016/j.numecd.2020.09.034 (2021).
- 1013 17 Gonzalez-Granillo, M. *et al.* Sex-specific lipid molecular signatures in obesity-  
1014 associated metabolic dysfunctions revealed by lipidomic characterization in ob/ob  
1015 mouse. *Biol Sex Differ* **10**, 11, doi:10.1186/s13293-019-0225-y (2019).
- 1016 18 Tchkonja, T. *et al.* Mechanisms and metabolic implications of regional differences  
1017 among fat depots. *Cell Metab* **17**, 644-656, doi:10.1016/j.cmet.2013.03.008 (2013).
- 1018 19 Alessi, M. C. & Juhan-Vague, I. PAI-1 and the metabolic syndrome: links, causes, and  
1019 consequences. *Arterioscler Thromb Vasc Biol* **26**, 2200-2207,  
1020 doi:10.1161/01.ATV.0000242905.41404.68 (2006).
- 1021 20 Baggio, L. L. & Drucker, D. J. Biology of incretins: GLP-1 and GIP. *Gastroenterology*  
1022 **132**, 2131-2157, doi:10.1053/j.gastro.2007.03.054 (2007).
- 1023 21 Poykko, S. M. *et al.* Low plasma ghrelin is associated with insulin resistance,  
1024 hypertension, and the prevalence of type 2 diabetes. *Diabetes* **52**, 2546-2553,  
1025 doi:10.2337/diabetes.52.10.2546 (2003).
- 1026 22 Sun, B. & Karin, M. Obesity, inflammation, and liver cancer. *J Hepatol* **56**, 704-713,  
1027 doi:10.1016/j.jhep.2011.09.020 (2012).
- 1028 23 Cohn, J. S., Wat, E., Kamili, A. & Tandy, S. Dietary phospholipids, hepatic lipid  
1029 metabolism and cardiovascular disease. *Curr Opin Lipidol* **19**, 257-262,  
1030 doi:10.1097/MOL.0b013e3282ffaf96 (2008).
- 1031 24 Jiang, J. T., Xu, N., Zhang, X. Y. & Wu, C. P. Lipids changes in liver cancer. *J Zhejiang*  
1032 *Univ Sci B* **8**, 398-409, doi:10.1631/jzus.2007.B0398 (2007).
- 1033 25 Yan, S. *et al.* Long-chain acyl-CoA synthetase in fatty acid metabolism involved in  
1034 liver and other diseases: an update. *World J Gastroenterol* **21**, 3492-3498,  
1035 doi:10.3748/wjg.v21.i12.3492 (2015).
- 1036 26 He, A. *et al.* Acetyl-CoA Derived from Hepatic Peroxisomal beta-Oxidation Inhibits  
1037 Autophagy and Promotes Steatosis via mTORC1 Activation. *Mol Cell* **79**, 30-42 e34,  
1038 doi:10.1016/j.molcel.2020.05.007 (2020).
- 1039 27 Semova, I. & Biddinger, S. B. Triglycerides in Nonalcoholic Fatty Liver Disease:  
1040 Guilty Until Proven Innocent. *Trends Pharmacol Sci* **42**, 183-190,  
1041 doi:10.1016/j.tips.2020.12.001 (2021).
- 1042 28 Leamy, A. K. *et al.* Enhanced synthesis of saturated phospholipids is associated with  
1043 ER stress and lipotoxicity in palmitate treated hepatic cells. *J Lipid Res* **55**, 1478-1488,  
1044 doi:10.1194/jlr.M050237 (2014).
- 1045 29 Wesolowski, S. R., Kasmi, K. C., Jonscher, K. R. & Friedman, J. E. Developmental  
1046 origins of NAFLD: a womb with a clue. *Nat Rev Gastroenterol Hepatol* **14**, 81-96,  
1047 doi:10.1038/nrgastro.2016.160 (2017).
- 1048 30 Ayonrinde, O. T. *et al.* Infant nutrition and maternal obesity influence the risk of non-  
1049 alcoholic fatty liver disease in adolescents. *J Hepatol* **67**, 568-576,  
1050 doi:10.1016/j.jhep.2017.03.029 (2017).
- 1051 31 Ayonrinde, O. T. *et al.* Sex differences between parental pregnancy characteristics and  
1052 nonalcoholic fatty liver disease in adolescents. *Hepatology* **67**, 108-122,  
1053 doi:10.1002/hep.29347 (2018).

- 1054 32 Christoforou, E. R. & Sferruzzi-Perri, A. N. Molecular mechanisms governing  
1055 offspring metabolic programming in rodent models of in utero stress. *Cell Mol Life Sci*  
1056 **77**, 4861-4898, doi:10.1007/s00018-020-03566-z (2020).
- 1057 33 Sun, Y. *et al.* Multigenerational maternal obesity increases the incidence of HCC in  
1058 offspring via miR-27a-3p. *J Hepatol* **73**, 603-615, doi:10.1016/j.jhep.2020.03.050  
1059 (2020).
- 1060 34 Colnot, S. & Lechel, A. Maternal obesity: A severe risk factor in hepatocarcinogenesis?  
1061 *J Hepatol* **73**, 502-504, doi:10.1016/j.jhep.2020.06.014 (2020).
- 1062 35 George, G. *et al.* Exposure to maternal obesity during suckling outweighs in utero  
1063 exposure in programming for post-weaning adiposity and insulin resistance in rats. *Sci*  
1064 *Rep* **9**, 10134, doi:10.1038/s41598-019-46518-9 (2019).
- 1065 36 Mora, A., Lipina, C., Tronche, F., Sutherland, C. & Alessi, D. R. Deficiency of PDK1  
1066 in liver results in glucose intolerance, impairment of insulin-regulated gene expression  
1067 and liver failure. *Biochem J* **385**, 639-648, doi:10.1042/BJ20041782 (2005).
- 1068 37 Yu, J. *et al.* PRLR regulates hepatic insulin sensitivity in mice via STAT5. *Diabetes*  
1069 **62**, 3103-3113, doi:10.2337/db13-0182 (2013).
- 1070 38 Wu, X. & Williams, K. J. NOX4 pathway as a source of selective insulin resistance and  
1071 responsiveness. *Arterioscler Thromb Vasc Biol* **32**, 1236-1245,  
1072 doi:10.1161/ATVBAHA.111.244525 (2012).
- 1073 39 Miller, A. A., Drummond, G. R., Mast, A. E., Schmidt, H. H. & Sobey, C. G. Effect of  
1074 gender on NADPH-oxidase activity, expression, and function in the cerebral  
1075 circulation: role of estrogen. *Stroke* **38**, 2142-2149,  
1076 doi:10.1161/STROKEAHA.106.477406 (2007).
- 1077 40 Bigsby, R. M. & Caperell-Grant, A. The role for estrogen receptor-alpha and prolactin  
1078 receptor in sex-dependent DEN-induced liver tumorigenesis. *Carcinogenesis* **32**, 1162-  
1079 1166, doi:10.1093/carcin/bgr094 (2011).
- 1080 41 Hodge, A. M. *et al.* Plasma phospholipid and dietary fatty acids as predictors of type 2  
1081 diabetes: interpreting the role of linoleic acid. *Am J Clin Nutr* **86**, 189-197,  
1082 doi:10.1093/ajcn/86.1.189 (2007).
- 1083 42 Saito, E. *et al.* Abdominal adiposity is associated with fatty acid desaturase activity in  
1084 boys: implications for C-reactive protein and insulin resistance. *Prostaglandins Leukot*  
1085 *Essent Fatty Acids* **88**, 307-311, doi:10.1016/j.plefa.2013.01.005 (2013).
- 1086 43 Warensjo, E., Riserus, U. & Vessby, B. Fatty acid composition of serum lipids predicts  
1087 the development of the metabolic syndrome in men. *Diabetologia* **48**, 1999-2005,  
1088 doi:10.1007/s00125-005-1897-x (2005).
- 1089 44 Bowman, T. A. *et al.* Acyl CoA synthetase 5 (ACSL5) ablation in mice increases  
1090 energy expenditure and insulin sensitivity and delays fat absorption. *Mol Metab* **5**, 210-  
1091 220, doi:10.1016/j.molmet.2016.01.001 (2016).
- 1092 45 Belkaid, A., Ouellette, R. J. & Surette, M. E. 17beta-estradiol-induced ACSL4 protein  
1093 expression promotes an invasive phenotype in estrogen receptor positive mammary  
1094 carcinoma cells. *Carcinogenesis* **38**, 402-410, doi:10.1093/carcin/bgx020 (2017).
- 1095 46 Tian, W. *et al.* Dynamic Expression Profile, Regulatory Mechanism and Correlation  
1096 with Egg-laying Performance of ACSF Gene Family in Chicken (*Gallus gallus*). *Sci*  
1097 *Rep* **8**, 8457, doi:10.1038/s41598-018-26903-6 (2018).
- 1098 47 Houben, T. *et al.* Cathepsin D regulates lipid metabolism in murine steatohepatitis. *Sci*  
1099 *Rep* **7**, 3494, doi:10.1038/s41598-017-03796-5 (2017).
- 1100 48 Zheng, H. *et al.* Oestrogen regulates the expression of cathepsin E-A-like gene through  
1101 ERBeta in liver of chicken (*Gallus gallus*). *J Genet* **97**, 145-155 (2018).
- 1102 49 Gertz, J. *et al.* Distinct properties of cell-type-specific and shared transcription factor  
1103 binding sites. *Mol Cell* **52**, 25-36, doi:10.1016/j.molcel.2013.08.037 (2013).

- 1104 50 Meech, R. *et al.* The UDP-Glycosyltransferase (UGT) Superfamily: New Members,  
1105 New Functions, and Novel Paradigms. *Physiol Rev* **99**, 1153-1222,  
1106 doi:10.1152/physrev.00058.2017 (2019).
- 1107 51 Xie, Y. & Xie, W. The Role of Sulfotransferases in Liver Diseases. *Drug Metab Dispos*  
1108 **48**, 742-749, doi:10.1124/dmd.120.000074 (2020).
- 1109 52 Yalcin, E. B. *et al.* Downregulation of sulfotransferase expression and activity in  
1110 diseased human livers. *Drug Metab Dispos* **41**, 1642-1650,  
1111 doi:10.1124/dmd.113.050930 (2013).
- 1112 53 Hardwick, R. N. *et al.* Altered UDP-glucuronosyltransferase and sulfotransferase  
1113 expression and function during progressive stages of human nonalcoholic fatty liver  
1114 disease. *Drug Metab Dispos* **41**, 554-561, doi:10.1124/dmd.112.048439 (2013).
- 1115 54 Oakberg, E. F. Duration of spermatogenesis in the mouse and timing of stages of the  
1116 cycle of the seminiferous epithelium. *Am J Anat* **99**, 507-516,  
1117 doi:10.1002/aja.1000990307 (1956).
- 1118 55 Mosconi, E., Minicozzi, A., Marzola, P., Cordiano, C. & Sbarbati, A. (1) H-MR  
1119 spectroscopy characterization of the adipose tissue associated with colorectal tumor. *J*  
1120 *Magn Reson Imaging* **39**, 469-474, doi:10.1002/jmri.24177 (2014).
- 1121 56 Ye, Q., Danzer, C. F., Fuchs, A., Wolfrum, C. & Rudin, M. Hepatic lipid composition  
1122 differs between ob/ob and ob/+ control mice as determined by using in vivo localized  
1123 proton magnetic resonance spectroscopy. *MAGMA* **25**, 381-389, doi:10.1007/s10334-  
1124 012-0310-2 (2012).
- 1125 57 Gonzalez-Granillo, M. *et al.* Selective estrogen receptor (ER)beta activation provokes  
1126 a redistribution of fat mass and modifies hepatic triglyceride composition in obese male  
1127 mice. *Mol Cell Endocrinol* **502**, 110672, doi:10.1016/j.mce.2019.110672 (2020).
- 1128 58 Parini, P., Johansson, L., Broijerssen, A., Angelin, B. & Rudling, M. Lipoprotein  
1129 profiles in plasma and interstitial fluid analyzed with an automated gel-filtration  
1130 system. *Eur J Clin Invest* **36**, 98-104, doi:10.1111/j.1365-2362.2006.01597.x (2006).
- 1131 59 Colombo, S. *et al.* Phospholipidome of endothelial cells shows a different adaptation  
1132 response upon oxidative, glycativ and lipoxidative stress. *Sci Rep* **8**, 12365,  
1133 doi:10.1038/s41598-018-30695-0 (2018).
- 1134 60 Rey, F. *et al.* Polar lipid profile of *Saccharina latissima*, a functional food from the sea.  
1135 *Algal Research* **39**, 101473, doi:<https://doi.org/10.1016/j.algal.2019.101473> (2019).
- 1136 61 Sousa, B. *et al.* Alteration in phospholipidome profile of myoblast H9c2 cell line in a  
1137 model of myocardium starvation and ischemia. *Journal of Cellular Physiology* **231**,  
1138 2266-2274, doi:10.1002/jcp.25344 (2016).
- 1139 62 Anjos, S. *et al.* Lipidomics Reveals Similar Changes in Serum Phospholipid Signatures  
1140 of Overweight and Obese Pediatric Subjects. *J Proteome Res* **18**, 3174-3183,  
1141 doi:10.1021/acs.jproteome.9b00249 (2019).
- 1142 63 Pluskal, T., Castillo, S., Villar-Briones, A. & Oresic, M. MZmine 2: modular  
1143 framework for processing, visualizing, and analyzing mass spectrometry-based  
1144 molecular profile data. *BMC Bioinformatics* **11**, 395, doi:10.1186/1471-2105-11-395  
1145 (2010).
- 1146 64 Hsu, F. F., Turk, J., Stewart, M. E. & Downing, D. T. Structural studies on ceramides  
1147 as lithiated adducts by low energy collisional-activated dissociation tandem mass  
1148 spectrometry with electrospray ionization. *J Am Soc Mass Spectrom* **13**, 680-695,  
1149 doi:10.1016/S1044-0305(02)00362-8 (2002).
- 1150 65 Hsu, F. F. & Turk, J. Characterization of phosphatidylinositol, phosphatidylinositol-4-  
1151 phosphate, and phosphatidylinositol-4,5-bisphosphate by electrospray ionization  
1152 tandem mass spectrometry: a mechanistic study. *J Am Soc Mass Spectrom* **11**, 986-999,  
1153 doi:10.1016/S1044-0305(00)00172-0 (2000).



- 1154 66 Hsu, F. F. & Turk, J. Electrospray ionization multiple-stage linear ion-trap mass  
1155 spectrometry for structural elucidation of triacylglycerols: assignment of fatty acyl  
1156 groups on the glycerol backbone and location of double bonds. *J Am Soc Mass*  
1157 *Spectrom* **21**, 657-669, doi:10.1016/j.jasms.2010.01.007 (2010).
- 1158 67 Robinson, M. D. & Oshlack, A. A scaling normalization method for differential  
1159 expression analysis of RNA-seq data. *Genome Biol* **11**, R25, doi:10.1186/gb-2010-11-  
1160 3-r25 (2010).
- 1161 68 Kim, D. *et al.* TopHat2: accurate alignment of transcriptomes in the presence of  
1162 insertions, deletions and gene fusions. *Genome Biol* **14**, R36, doi:10.1186/gb-2013-14-  
1163 4-r36 (2013).
- 1164 69 Langmead, B. & Salzberg, S. L. Fast gapped-read alignment with Bowtie 2. *Nat*  
1165 *Methods* **9**, 357-359, doi:10.1038/nmeth.1923 (2012).
- 1166 70 Liao, Y., Smyth, G. K. & Shi, W. featureCounts: an efficient general purpose program  
1167 for assigning sequence reads to genomic features. *Bioinformatics* **30**, 923-930,  
1168 doi:10.1093/bioinformatics/btt656 (2014).
- 1169 71 Love, M. I., Huber, W. & Anders, S. Moderated estimation of fold change and  
1170 dispersion for RNA-seq data with DESeq2. *Genome Biol* **15**, 550, doi:10.1186/s13059-  
1171 014-0550-8 (2014).
- 1172

Table 1. Plasma TG, cholesterol and adipokine levels in female (F) and male (M) offspring.

| Diet<br>Sex   | C/HF      |                       | HF/HF                 |                           |
|---------------|-----------|-----------------------|-----------------------|---------------------------|
|               | F         | M                     | F                     | M                         |
| Total TG      | 0.54±0.04 | 0.58±0.02             | 0.65±0.05             | 1.01±0.16 <sup>#*</sup>   |
| Total Chol    | 2.7±0.2   | 2.4±0.3               | 3.2±0.2 <sup>#</sup>  | 3.6±0.3 <sup>##</sup>     |
| VLDL-Chol     | 0.13±0.01 | 0.11±0.01             | 0.14±0.01             | 0.14±0.02                 |
| LDL-Chol      | 0.78±0.06 | 0.67±0.05             | 0.88±0.16             | 0.94±0.29                 |
| HDL-Chol      | 1.8±0.1   | 1.7±0.1               | 2.1±0.1 <sup>##</sup> | 2.4±0.1 <sup>###*</sup>   |
| Ghrelin (mM)  | 4583±341  | 5165±181              | 5074±698 <sup>#</sup> | 4673±40 <sup>p=0.05</sup> |
| GIP (mM)      | 705±101   | 753±217               | 2716±743 <sup>#</sup> | 764±29 <sup>*</sup>       |
| GLP-1 (mM)    | 135±31    | 160±26                | 162±46                | 127±16 <sup>*</sup>       |
| PAI-1 (mM)    | 4241±469  | 7390±997 <sup>*</sup> | 4267±387              | 9633±1717 <sup>*</sup>    |
| Resistin (mM) | 1690±172  | 2100±380              | 2772±145 <sup>#</sup> | 1742±283 <sup>*</sup>     |

Animals were fasted for 2h prior the blood collection. Data are presented as mean ± sem. F: female; M: male; \*, M vs F and #, C/HF vs HF/HF. \* or #, P<0.05; \*\* or ##, P<0.01; ###, P<0.001 or. For F-C/HF, n=5; for M-C/HF, n=6; for F-HF/HF, n=6; for M-HF/HF, n=4.

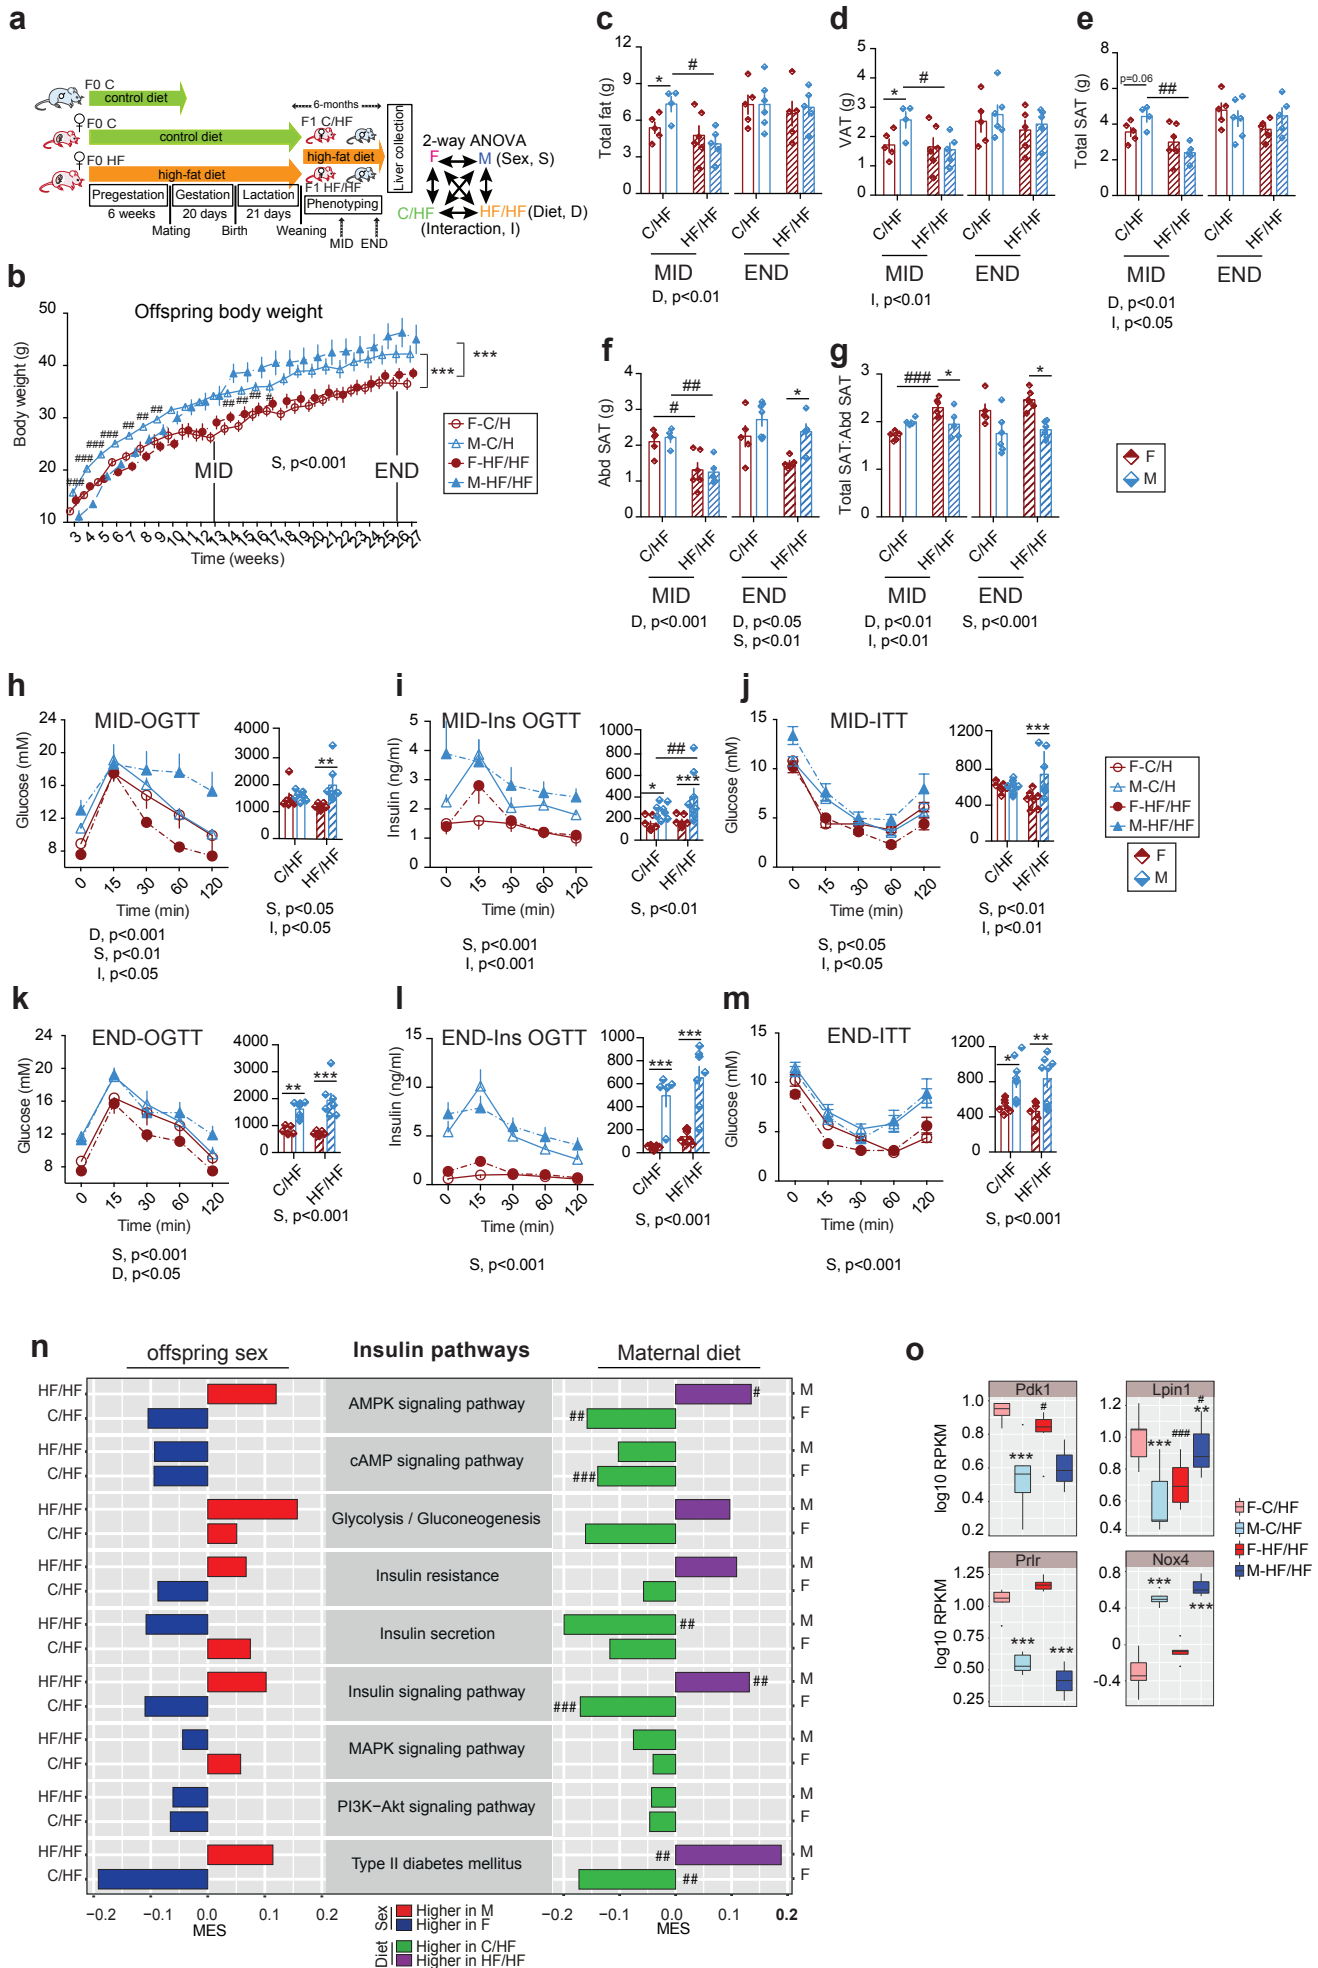

Figure 1.

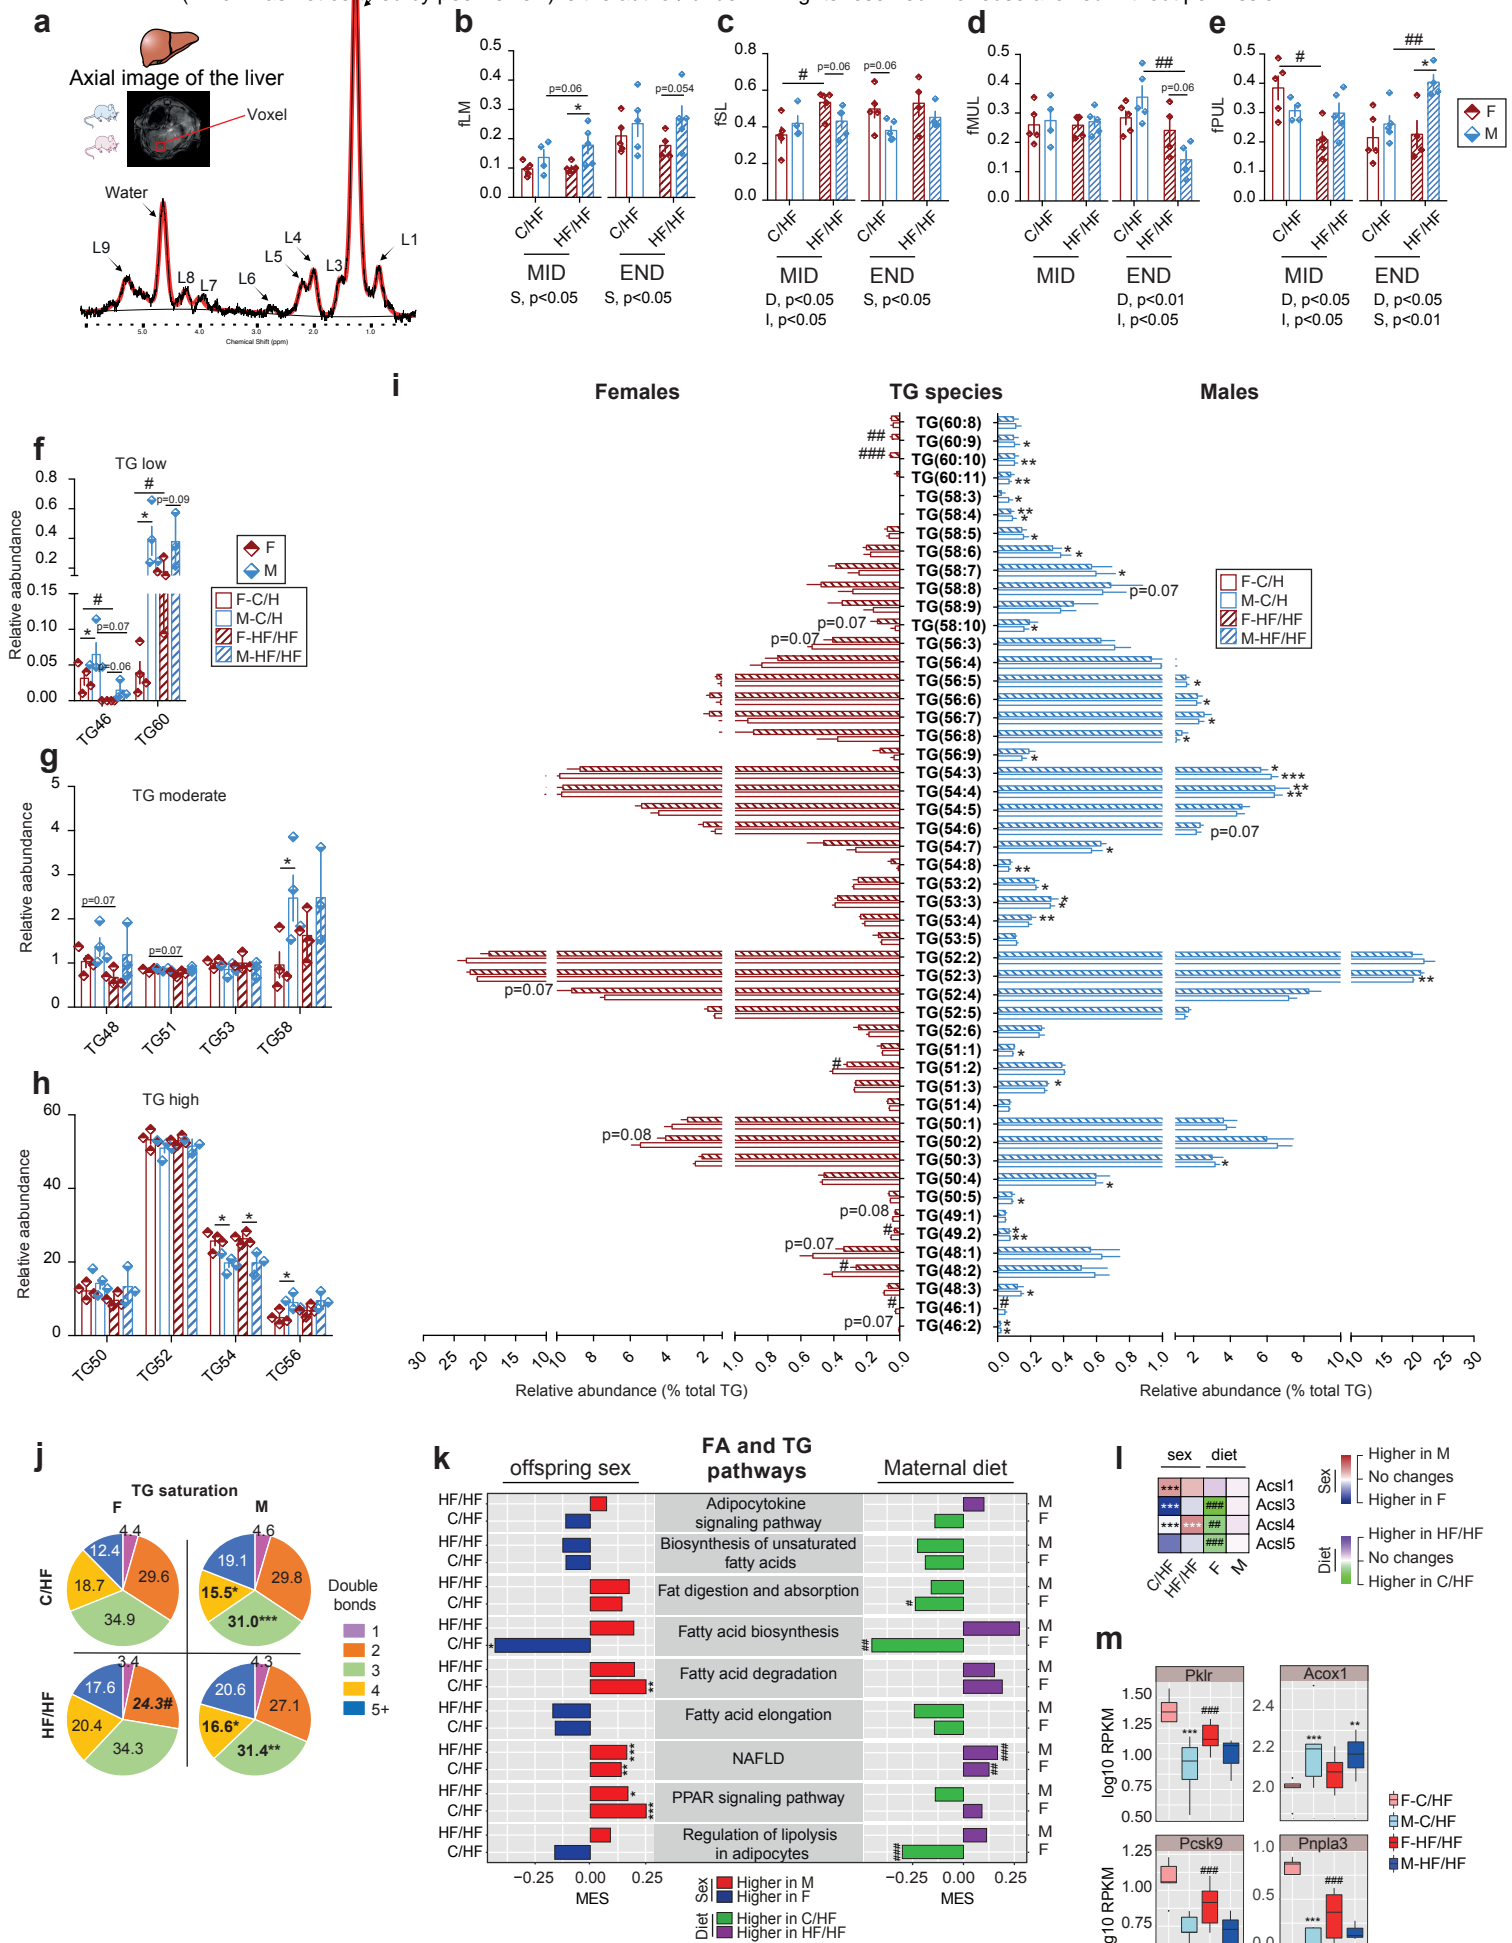

Figure 2.

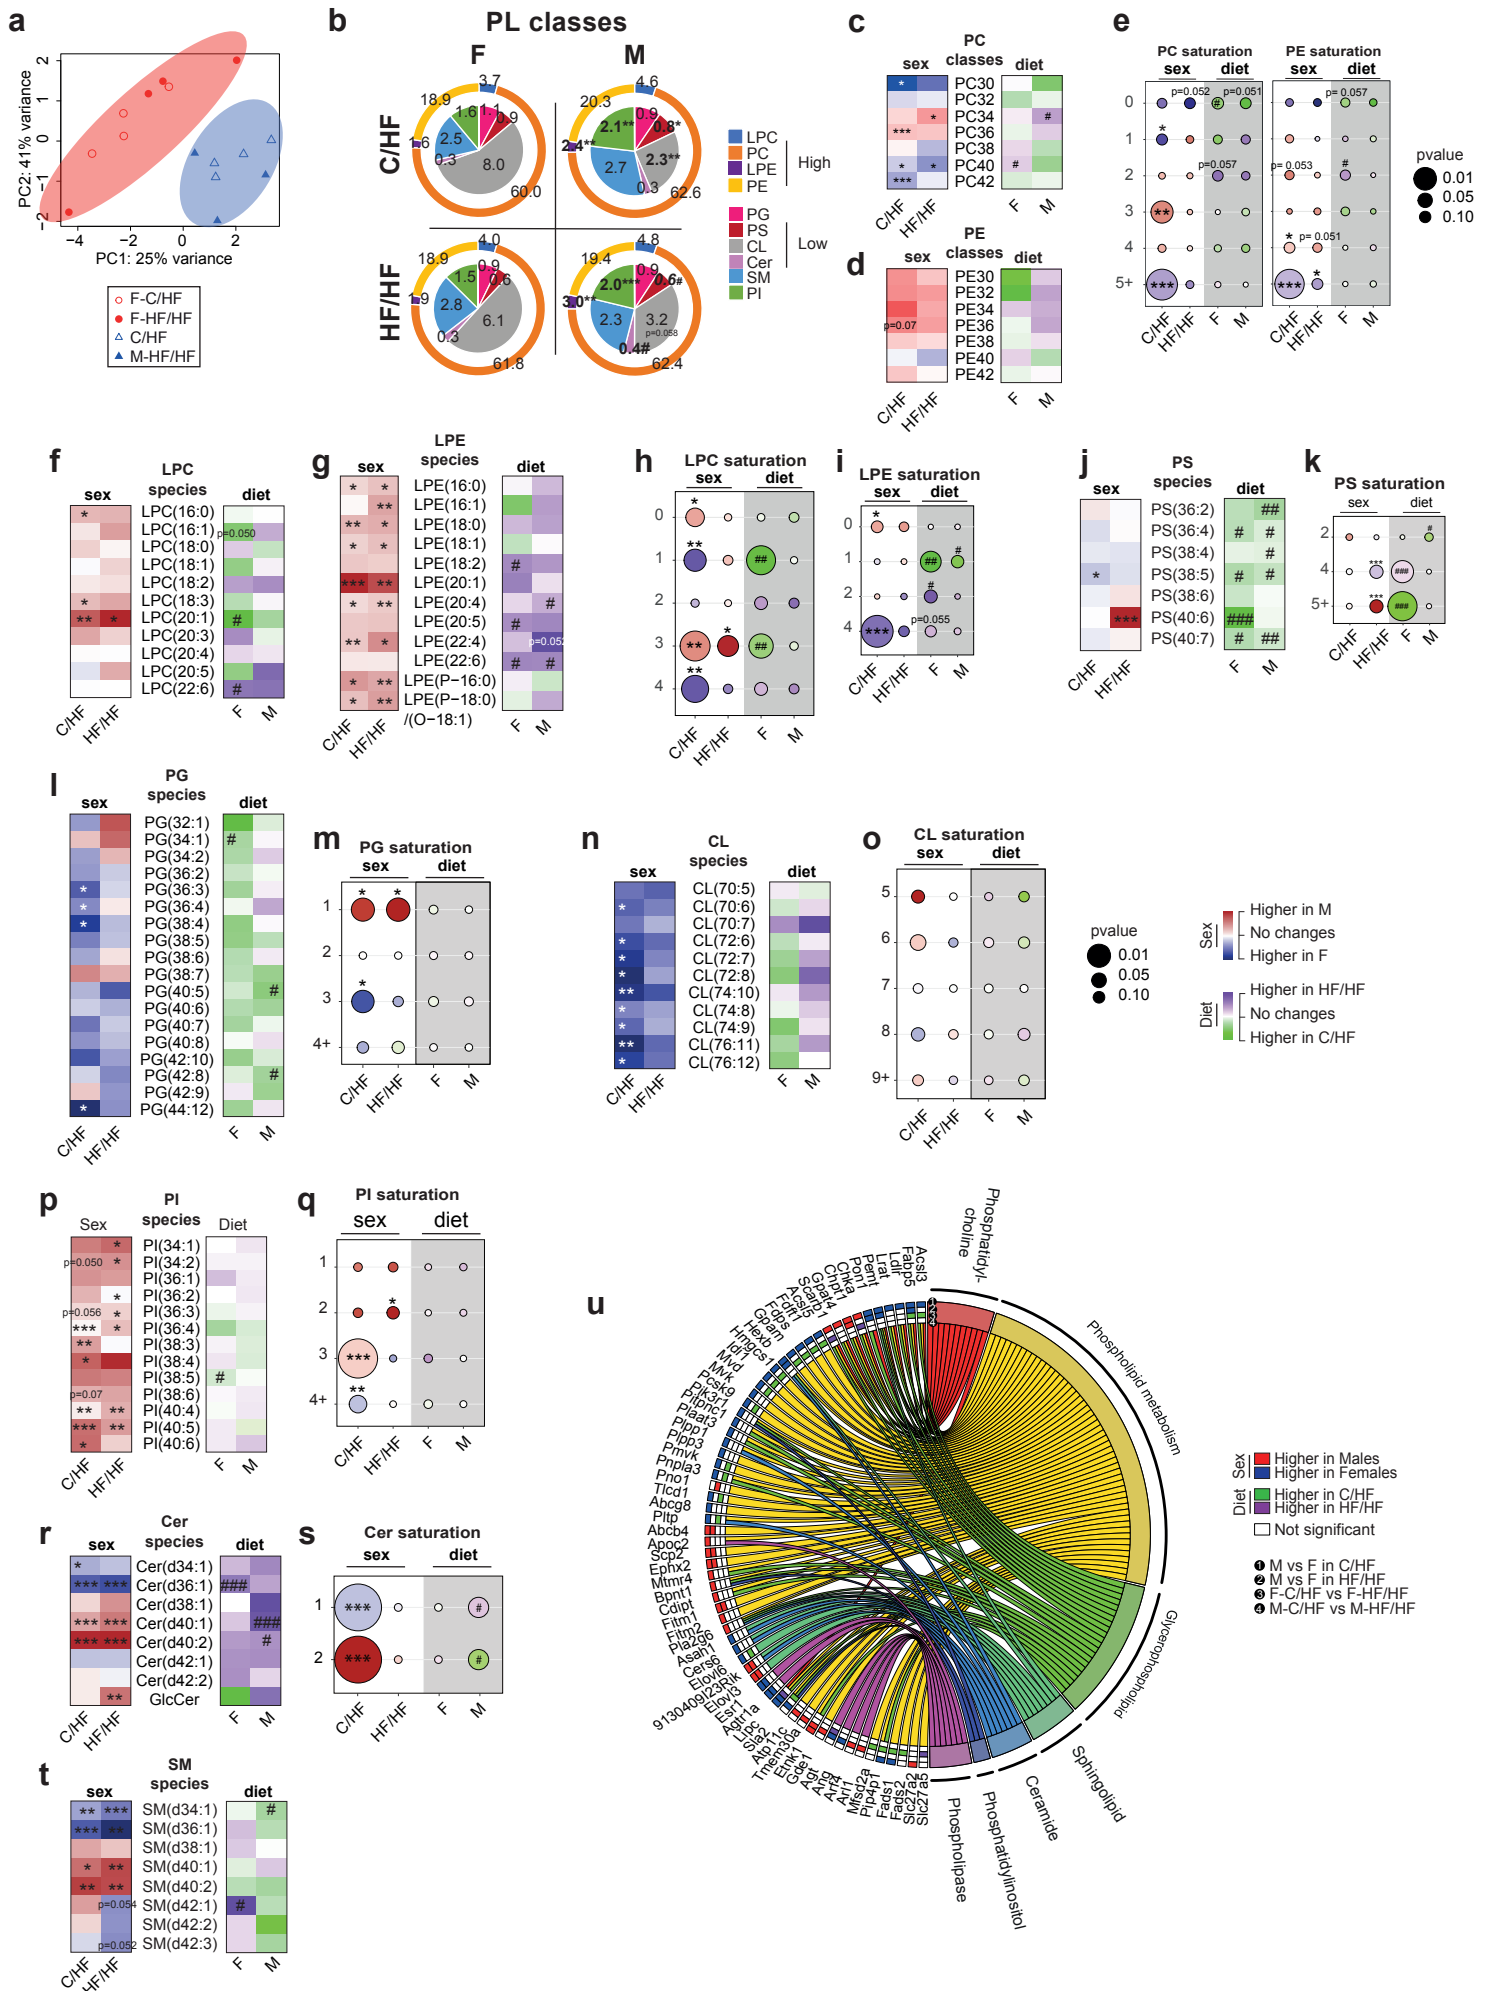

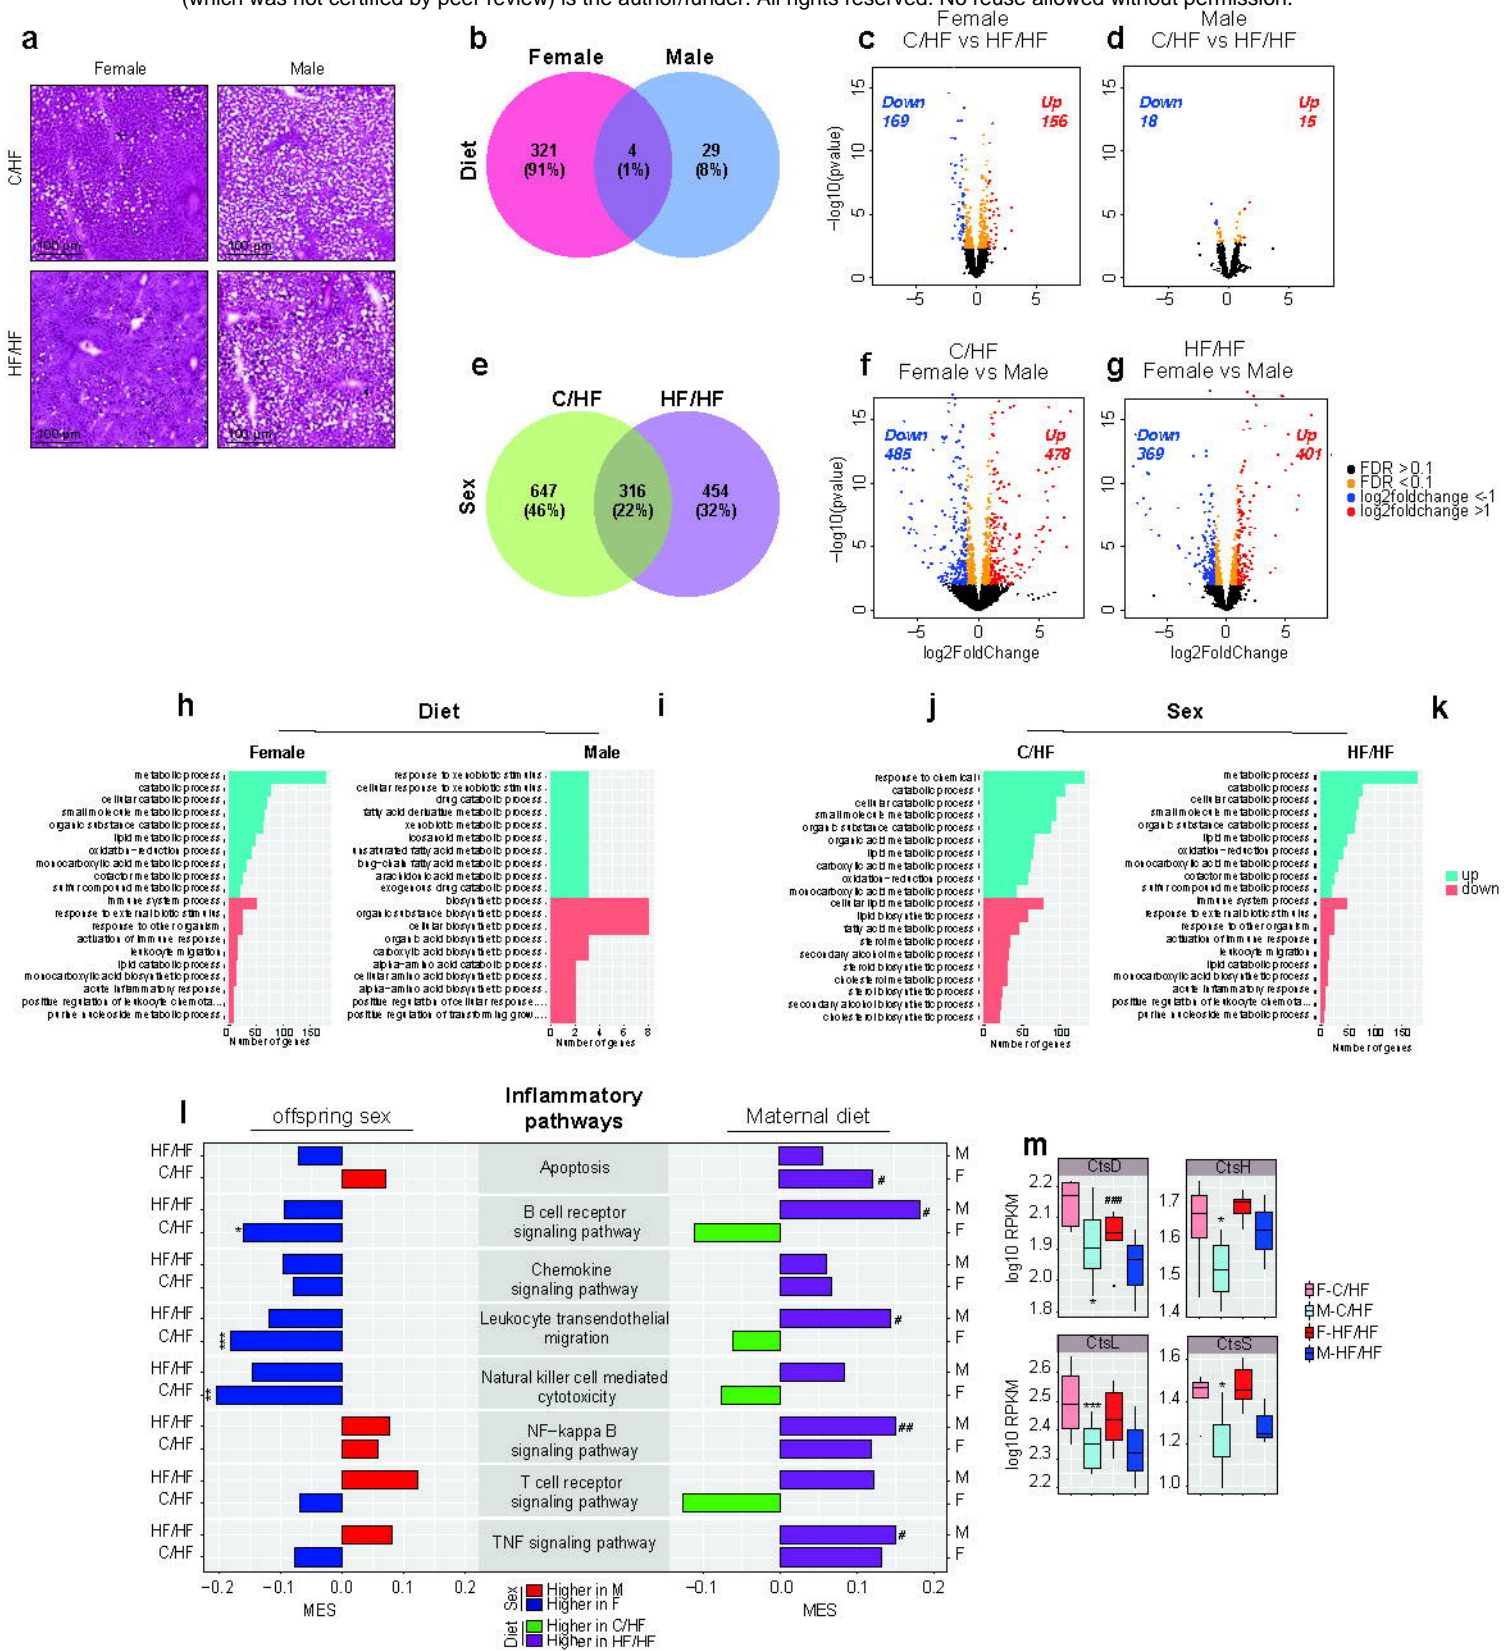

Figure 4.

**a**

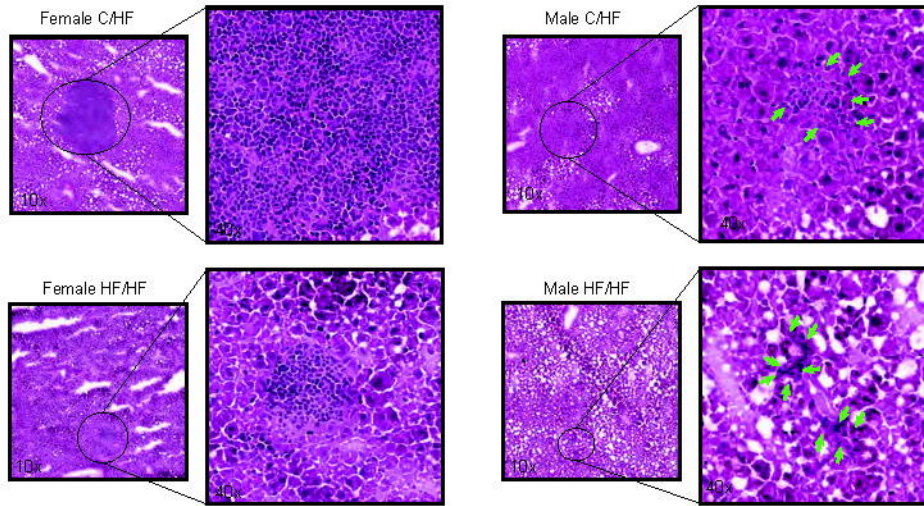

**b**

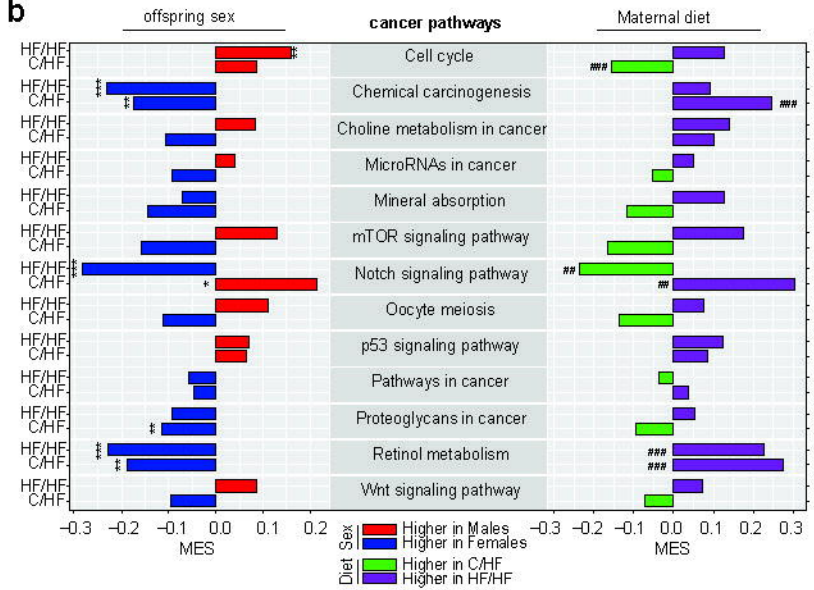

**c**

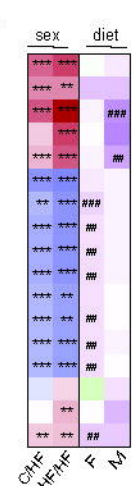

**d**

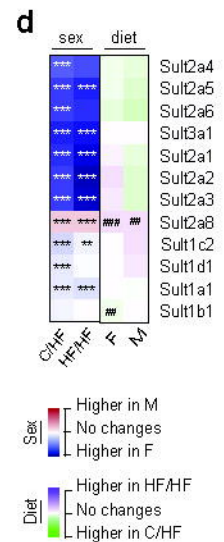

**e**

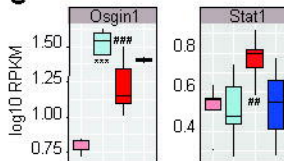

**f**

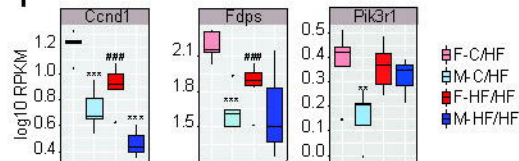

Figure 5.

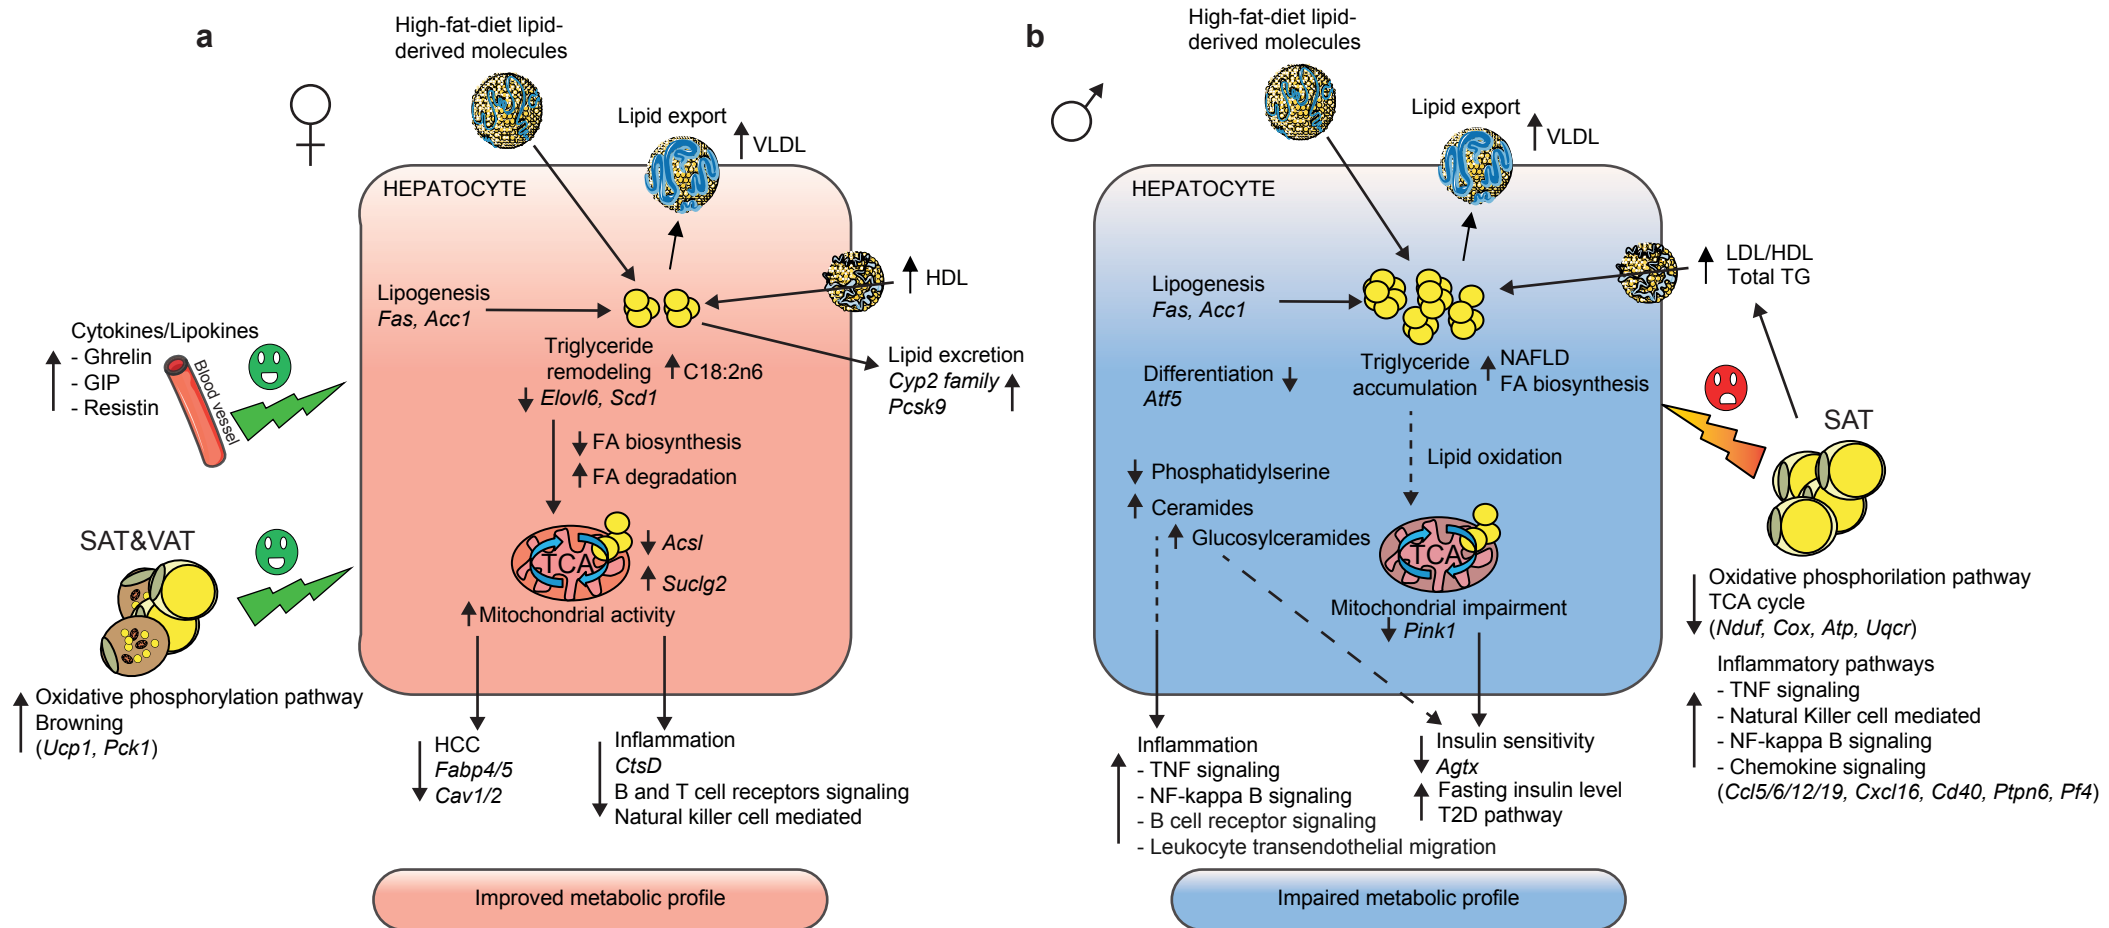

Figure 6.
